# Supplementary material for: Facile syntheses of N-heterocyclic carbene precursors through Cu(ii)- or Ag(i)-catalyzed amination of N-alkynyl formamidines
Source: Royal Society of Chemistry journal article supplement (doi:10.1039/c6nj03276a), 2017-01-01
Supplement: c6nj03276a1.pdf [file c6nj03276a1.pdf]

## Facile syntheses of N-heterocyclic carbene precursors through Cu(II)- or Ag(I)-catalyzed amination of N-alkynyl formamidines

Caiyun Zhang, Fan Zhang, Shichang Lv, Min Shi, and Jun Zhang\*

### General Information:

Unless otherwise stated, all reactions and manipulations were performed using standard Schlenk techniques. All solvents were purified by distillation using standard methods. Commercially available reagents were used without further purification. NMR spectra were recorded by using a Bruker 400 MHz spectrometer. Chemical shifts are reported in ppm from tetramethylsilane with the solvent resonance as the internal standard ( $^1\text{H}$  NMR  $\text{CDCl}_3$ : 7.26 ppm;  $^{13}\text{C}$  NMR  $\text{CDCl}_3$ : 77.0 ppm). Mass spectra were recorded on the HP-5989 instrument by EI/ESI methods. X-ray diffraction analysis was performed by using a Bruker Smart-1000 X-ray diffractometer.

### Synthesis of 1a-1d, 2a-2c:

#### Procedure A:

NaH (60% suspension in mineral oil, 1.5 eq.) was added into a stirred solution of formimidamide (1.0 eq.) in dried DMF at 0 °C under  $\text{N}_2$ . The mixture was then warmed to room temperature and stirred for 1 h. Bromoalkynes (1.1~1.2 eq.) was added drop wise to the mixture. After the addition was completed, the reaction mixture was stirred for an additional 4 h. When the reaction was completed (monitored by TLC), the reaction was quenched with water and the mixture was extracted for three times with EtOAc. The combined organic layer was washed with  $\text{H}_2\text{O}$ , saturated NaCl aqueous solution and dried with anhydrous  $\text{Na}_2\text{SO}_4$ . The organic layer was concentrated under reduced pressure to afford the desired product.

#### Procedure B:

A Schlenk tube was charged with formamidine (1.0 eq.), KI (2.0 eq.),  $\text{K}_2\text{CO}_3$  (2.0 eq.), evacuated, and backfilled with  $\text{N}_2$ . Then the solvent DMF was added under  $\text{N}_2$  atmosphere. Then 1-bromo-2-butyne (1.1 eq.) was added into the solution. The mixture was reflux at 100 °C for 8 h. When the reaction was completed (monitored by TLC), the reaction was quenched

with water and the mixture was extracted for three times with EtOAc. The organic layer was dried over Na<sub>2</sub>SO<sub>4</sub>, and concentrated in vacuum to get crude product.

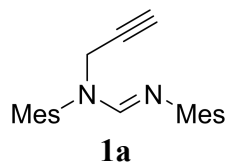

Following the procedure **A**, *N,N'*-dimesitylformimidamide (1.0 g, 3.57 mmol), bromopropyne (467 mg, 3.92 mmol), NaH (214 mg, 5.36 mmol) afford the product **1a** as pure brown oil (1.1 g, 96%). <sup>1</sup>H NMR (400 MHz, CDCl<sub>3</sub>) δ = 7.18 (s, 1H, NCHN), 6.93 (s, 2H, ArH), 6.84 (s, 2H, ArH), 4.56 (s, 2H, NCH<sub>2</sub>), 2.29 (s, 9H, ArCH<sub>3</sub>), 2.24 (s, 3H, ArCH<sub>3</sub>), 2.20 (s, 1H, CCH), 2.18 (s, 6H, ArCH<sub>3</sub>); <sup>13</sup>C NMR (100 MHz, CDCl<sub>3</sub>) δ = 151.5 (NCN), 146.7 (ArC), 138.3 (ArC), 137.7 (ArC), 137.2 (ArC), 131.3 (ArC), 129.3 (ArC), 129.1 (ArC), 128.4 (ArC), 79.4 (CHC), 71.9 (CHC), 36.8 (NCH<sub>2</sub>), 20.9 (ArCH<sub>3</sub>), 20.6 (ArCH<sub>3</sub>), 18.5 (ArCH<sub>3</sub>), 18.2 (ArCH<sub>3</sub>).

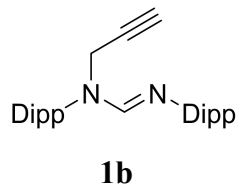

Following the procedure **A**, *N,N'*-bis(2,6-diisopropylphenyl)formimidamide (500 mg, 1.37 mmol), bromopropyne (194.4 mg, 1.64 mmol), NaH (82.4 mg, 2.05 mmol) afford the product **1b** as pure brown solid (581 mg, 98%). <sup>1</sup>H NMR (400 MHz, CDCl<sub>3</sub>) δ = 7.33 (t, *J* = 7.6 Hz, 1H, ArH), 7.21 (s, 1H, NCHN), 7.19 (d, *J* = 7.6 Hz, 2H, ArH), 7.08 (d, *J* = 7.6 Hz, 2H, ArH), 6.99 (t, *J* = 8.0 Hz, 1H, ArH), 4.56 (d, *J* = 2.0 Hz, 2H, NCH<sub>2</sub>), 3.31-3.20 (m, 4H, ArCH(CH<sub>3</sub>)<sub>2</sub>), 2.21 (s, 1H, CCH), 1.30 (d, *J* = 6.8 Hz, 6H, CH<sub>3</sub>), 1.19 (d, *J* = 6.8 Hz, 12H, CH<sub>3</sub>), 1.14 (d, *J* = 6.8 Hz, 6H, CH<sub>3</sub>); <sup>13</sup>C NMR (100 MHz, CDCl<sub>3</sub>) δ = 150.1 (NCHN), 148.6 (ArC), 146.7 (ArC), 139.8 (ArC), 137.7 (ArC), 129.0 (ArC), 124.1 (ArC), 122.8 (ArC), 122.6 (ArC), 78.9 (CHC), 72.3 (CHC), 53.4 (ArCH<sub>2</sub>), 38.6 (NCH<sub>2</sub>), 28.5 (CH<sub>3</sub>), 27.8 (CH<sub>3</sub>), 24.9 (CH<sub>3</sub>), 24.5 (CH<sub>3</sub>), 23.6 (CH<sub>3</sub>).

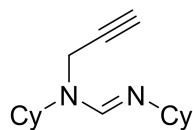

**1c**

Following the procedure **A**, *N,N'*-dicyclohexylformimidamide (2 g, 9.60 mmol), bromopropyne (1.86 mg, 15.8 mmol), NaH (345 mg, 14.4 mmol) afford the product **1c** as pale brown oil (1.04 g, 44%). <sup>1</sup>H NMR (400 MHz, CDCl<sub>3</sub>)  $\delta$  = 7.45 (s, 1H, NCHN), 4.04 (d, *J* = 2.5 Hz, 2H, NCH<sub>2</sub>), 3.31-3.16 (m, 1H, NCyH), 2.93-2.80 (m, 1H, NCyH), 2.13-2.08 (m, *J* = 2.4 Hz, 1H, CCH), 1.93-1.02 (m, 22H, CyH). <sup>13</sup>C NMR (100 MHz, CDCl<sub>3</sub>)  $\delta$  = 149.73 (NCHN), 81.08 (CHC), 77.21 (CHC), 69.93 (NCyC), 64.38 (NCyC), 58.10 (NCH<sub>2</sub>), 35.55 (CyC), 34.48 (CyC), 32.69 (CyC), 31.54 (CyC), 29.21 (CyC), 25.55 (CyC), 25.31 (CyC), 25.13 (CyC), 24.86 (CyC), 24.57 (CyC).

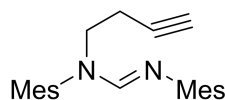

**1d**

Following the procedure **B**, *N,N'*-dimesitylformimidamide (1.0 g, 3.57 mmol), KI (1.07 g, 7.13 mmol), K<sub>2</sub>CO<sub>3</sub> (985 mg, 7.13 mmol), 4-bromo-1-butyne (475 mg, 3.57 mmol) in DMF refluxing 18 h afford the product **1d** as colorless oil (350 mg, 31%). <sup>1</sup>H NMR (400 MHz, CDCl<sub>3</sub>)  $\delta$  = 7.12 (s, 1H, NCHN), 6.91 (s, 2H, ArH), 6.82 (s, 2H, ArH), 3.91 (t, *J* = 7.6 Hz, 2H, CH<sub>2</sub>), 2.75-2.70 (m, 2H, CH<sub>2</sub>), 2.28 (s, 3H, ArCH<sub>3</sub>), 2.24 (s, 6H, ArCH<sub>3</sub>), 2.23 (s, 4H, ArCH<sub>3</sub>), 2.14 (s, 6H, ArCH<sub>3</sub>); <sup>13</sup>C NMR (100 MHz, CDCl<sub>3</sub>)  $\delta$  = 152.2 (NCHN), 146.9 (ArC), 139.1 (ArC), 137.3 (ArC), 136.3 (ArC), 131.2 (ArC), 129.4 (ArC), 129.0 (ArC), 128.4 (ArC), 81.9 (CHC), 69.4 (CHC), 47.6 (NCH<sub>2</sub>), 20.8 (CH<sub>3</sub>), 20.6 (CH<sub>3</sub>), 18.6 (CH<sub>3</sub>), 18.3 (CH<sub>3</sub>), 17.5 (CH<sub>3</sub>).

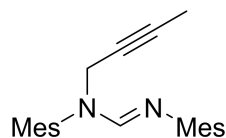

**2a**

Following the procedure **A**, *N,N'*-dimesitylformimidamide (3.00 g, 10.70 mmol), 1-bromo-2-butyne (1.70 g, 12.84 mmol), NaH (642 mg, 16.05 mmol) afford the product **2a** as pare brown oil (3.90 g, 98%). <sup>1</sup>H NMR (400 MHz, CDCl<sub>3</sub>) δ = 7.13 (s, 1H, NCHN), 6.90 (s, 2H, ArH), 6.81 (s, 2H, ArH), 4.46 (d, *J* = 2.0 Hz, 2H, NCH<sub>2</sub>), 2.27 (s, 9H, ArCH<sub>3</sub>), 2.22 (s, 3H, ArCH<sub>3</sub>), 2.16 (s, 6H, ArCH<sub>3</sub>), 1.76 (s, 3H, CCH<sub>3</sub>); <sup>13</sup>C NMR (100 MHz, CDCl<sub>3</sub>) δ = 151.5 (NCHN), 146.9 (ArC), 138.6 (ArC), 137.4 (ArC), 137.1 (ArC), 131.1 (ArC), 129.1 (ArC), 129.1 (ArC), 128.3 (ArC), 79.3 (CHC), 74.5 (CHC), 37.2 (NCH<sub>2</sub>), 20.8 (CH<sub>3</sub>), 20.6 (CH<sub>3</sub>), 18.4 (CH<sub>3</sub>), 18.1 (CH<sub>3</sub>).

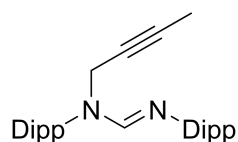

**2b**

Following the procedure **A**, *N,N'*-bis (2,6-diisopropylphenyl) formimidamide (3.00 g, 8.22 mmol), 1-bromo-2-butyne (1.30 g, 9.86 mmol), NaH (494 mg, 12.33 mmol) afford the product **2b** as pare brown solid (3.36 g, 98% ). <sup>1</sup>H NMR (400 MHz, CDCl<sub>3</sub>) δ = 7.37 -7.31 (m, 1H), 7.20 (d, *J* = 6.2 Hz, 3H), 7.10 (d, *J* = 7.5 Hz, 2H), 7.01 (dd, *J* = 8.2, 7.0 Hz, 1H), 4.50 (d, *J* = 2.3 Hz, 2H, NCH<sub>2</sub>), 3.36-3.23 (m, 4H, ArCH(CH<sub>3</sub>)<sub>2</sub>), 1.79 (d, *J* = 2.3 Hz, 3H, CCH<sub>3</sub>), 1.32 (d, *J* = 6.8 Hz, 6H, ArCHCH<sub>3</sub>), 1.21 (d, *J* = 6.9 Hz, 12H, ArCHCH<sub>3</sub>), 1.16 (d, *J* = 6.9 Hz, 6H, ArCHCH<sub>3</sub>); <sup>13</sup>C NMR (100 MHz, CDCl<sub>3</sub>) δ = 150.1 (NCHN), 148.4 (ArC), 146.9 (ArC), 139.8 (ArC), 138.1 (ArC), 128.8 (ArC), 124.1 (ArC), 122.6 (ArC), 79.80 (CHC), 74.2 (CHC), 39.2 (NCH<sub>2</sub>), 28.6 (CH<sub>3</sub>), 27.7 (CH<sub>3</sub>), 24.9 (CH<sub>3</sub>), 24.4 (CH<sub>3</sub>), 23.6 (CH<sub>3</sub>).

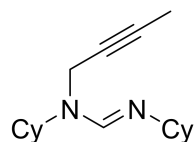

**2c**

Following the procedure **C**, *N,N'*-dicyclohexylformimidamide (1.5 g, 7.20 mmol ), KI (2.39 g, 14.4 mmol), K<sub>2</sub>CO<sub>3</sub> (1.99 g, 14.4 mmol ), 1-bromo-2-butyne (1.05 g, 7.92 mmol)

afford the product **2c** as pure brown oil (1.43 g, 77%). <sup>1</sup>H NMR (400 MHz, CDCl<sub>3</sub>) δ = 7.41 (s, 1H, NCHN), 3.95 (d, *J* = 2.4 Hz, 2H, NCH<sub>2</sub>), 3.27-3.21 (m, 1H, NCyH), 2.84-2.79 (m, 1H, NCyH), 1.83-1.77 (m, 4H, CyH), 1.75 (s, 3H, CCH<sub>3</sub>), 1.72-1.69 (m, 2H, CyH), 1.61-1.54 (m, 3H, CyH), 1.43-1.22 (m, 8H, CyH), 1.13-1.08 (m, 3H, CyH); <sup>13</sup>C NMR (100 MHz, CDCl<sub>3</sub>) δ = 150.5 (NCHN), 64.8 (CHC), 58.2 (CHC), 35.9 (NCH<sub>2</sub>), 33.7 (CyC), 31.9 (CyC), 25.9 (CyC), 25.6 (CyC), 25.6 (CyC), 25.4 (CyC).

### Synthesis of complexes 3~9:

**Procedure C:** A Schlenk tube was charged with formamidine (1.0 eq.) and Cu(OTf)<sub>2</sub> (1.0 eq.), evacuated, and backfilled with N<sub>2</sub>. Dried DCE was successively added. The mixture was then stirred at 80 °C for 2 h. When the reaction was completed (monitored by TLC), the reaction was quenched with water and the mixture was filtered. The filtration was extracted by DCM for three times. The organic layer was dried with Na<sub>2</sub>SO<sub>4</sub>, and concentrated in vacuum, and purified through column chromatography on silica gel to afford the product.

**Procedure D:** A Schlenk tube was charged with formamidine (1.0 eq.) and AgOTf (1.0 eq.), evacuated, and backfilled with N<sub>2</sub>. Dried DCE was successively added. The mixture was then stirred at 80 °C for 2 h. When the reaction was completed (monitored by TLC), the reaction was quenched with water and the mixture was filtered. The filtration was extracted by DCM for three times. The organic layer was dried with Na<sub>2</sub>SO<sub>4</sub>, and concentrated in vacuum and purified through column chromatography on silica gel to afford the product.

**Procedure E:** A Schlenk tube was charged with formamidine (1.0 eq.) and AgOTf (1.0 eq.), evacuated, and backfilled with N<sub>2</sub>. Dried DCE was successively added. The mixture was then stirred at room temperature for 2 h. When the reaction was completed (monitored by TLC), the reaction was quenched with water and the mixture was filtered. The filtration was extracted by DCM for three times. The organic layer was dried with Na<sub>2</sub>SO<sub>4</sub>, and concentrated in vacuum and purified through column chromatography on silica gel to afford the product.

**Procedure F:** A Schlenk tube was charged with formamidine (1.0 eq.), AgOTf (0.1 eq.), HOTf (1.0 eq.), evacuated, and backfilled with N<sub>2</sub>. Dried DCE was successively added. The mixture was then stirred at room temperature for 3 h, and 80 °C for 4 h. The reaction was quenched with water and the mixture was filtered. The filtration was extracted by DCM for three times. The organic layer was dried over Na<sub>2</sub>SO<sub>4</sub>, and concentrated in vacuum to afford the product in the NMR yield.

**Procedure G:** A Schlenk tube was charged with formamidine (1.0 eq.), Cu(OTf)<sub>2</sub> (0.1 eq.), HOTf (1.0 eq.), evacuated, and backfilled with N<sub>2</sub>. Dried DCE was successively added. The mixture was then stirred at room temperature for 3 h, and 80 °C for 4 h. The reaction was quenched with water and the mixture was filtered. The filtration was extracted by DCM for three times. The organic layer was dried over Na<sub>2</sub>SO<sub>4</sub>, and concentrated in vacuum to afford the product in the NMR yield.

**Procedure H:** A Schlenk tube was charged with formamidine (1.0 eq.), HOTf (1.0 eq.), evacuated, and backfilled with N<sub>2</sub>. Dried DCE was successively added. The mixture was then stirred at room temperature for 3 h, and 80 °C for 4 h. The reaction was quenched with water and the mixture was filtered. The filtration was extracted by DCM for three times. The organic layer was dried over Na<sub>2</sub>SO<sub>4</sub>, and concentrated in vacuum to afford the product in the NMR yield.

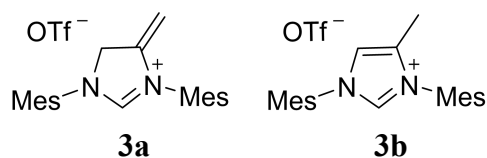

Following the procedure C, **1a** (100 mg, 0.314 mmol) and Cu(OTf)<sub>2</sub> (113.6 mg, 0.314 mmol) afford the product **3a** as pale yellow oil (108 mg, 73%). Mp: 215-216 °C; <sup>1</sup>H NMR (400 MHz, CDCl<sub>3</sub>) δ = 9.18 (s, 1H, NCHN), 7.02 (s, 2H, ArH), 6.98 (s, 2H, ArH), 5.06 (m, 2H, NCH<sub>2</sub>), 4.97 (d, *J* = 2.4 Hz, 1H, CCH<sub>2</sub>), 4.53 (d, *J* = 3.2 Hz, 1H, CCH<sub>2</sub>), 2.33 (s, 9H, ArCH<sub>3</sub>), 2.31 (s, 3H, ArCH<sub>3</sub>), 2.26 (s, 6H, ArCH<sub>3</sub>); <sup>13</sup>C NMR (100 MHz, CDCl<sub>3</sub>) δ = 160.6 (NCHN), 141.2 (ArC), 141.0 (ArC), 140.2 (ArC), 135.4 (ArC), 134.6 (ArC), 130.1 (ArC),

129.7 (ArC), 126.4 (CCH<sub>2</sub>), 120.4 (q,  $J_{C-F}$ =319 Hz), 94.8 (CCH), 55.4 (NCH<sub>2</sub>), 21.1 (CH<sub>3</sub>), 21.0 (CH<sub>3</sub>), 17.5 (CH<sub>3</sub>), 17.3 (CH<sub>3</sub>), 17.2 (CH<sub>3</sub>); IR (KBr):  $\nu$  (cm<sup>-1</sup>) 3017, 2922, 2852, 1672, 1618, 1483, 1462, 1257, 1153, 1030, 854, 637; HRMS (ESI):  $m/z$  [M-OTf]<sup>+</sup> calcd. for C<sub>22</sub>H<sub>27</sub>N<sub>2</sub><sup>+</sup>:319.2174, found: 319.2252.

Following the procedure **D**, **1a** (100 mg, 0.314 mmol) and AgOTf (81 mg, 0.314 mmol) afford the product **3a** in a 39% NMR yield.

Following the procedure **F**, **1a** (50 mg, 0.157 mmol), AgOTf (4 mg, 0.015 mmol), and HOTf (0.023 ml, 0.157 mmol) afford the product **3b** in a 90% NMR yield. Our data are in full agreement with those reported in the literature.<sup>1</sup> <sup>1</sup>H NMR (400 MHz, CDCl<sub>3</sub>)  $\delta$  = 9.20 (s, 1H, NCHN), 7.30 (s, 1H, NCH), 7.06 (d,  $J$  = 17.4 Hz, 4H, ArH), 2.36 (d,  $J$  = 8.0 Hz, 6H, CH<sub>3</sub>), 2.15 (d,  $J$  = 9.3 Hz, 9H, CH<sub>3</sub>), 2.08 (s, 6H, CH<sub>3</sub>).

Following the procedure **G**, **1a** (50 mg, 0.157 mmol), Cu(OTf)<sub>2</sub> (5 mg, 0.015 mmol), and HOTf (0.023 ml, 0.157 mmol) afford the product **3a** and **3b** in a 62% and 28% NMR yield.

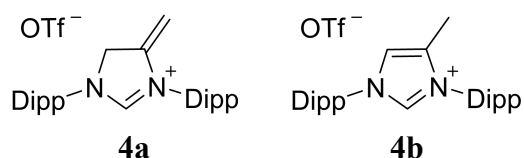

Following the procedure **C**, **1b** (100 mg, 0.248 mmol) and Cu(OTf)<sub>2</sub> (89 mg, 0.248 mmol) afford the product **4a** as pale yellow solid (96 mg, 70%). Mp: 155-156 °C; <sup>1</sup>H NMR (400 MHz, CDCl<sub>3</sub>)  $\delta$  = 9.21 (s, 1H, NCHN), 7.57-7.49 (m, 2H, ArH), 7.34 (d,  $J$  = 8.0 Hz, 2H, ArH), 7.30 (d,  $J$  = 7.6 Hz, 2H, ArH), 5.20 (d,  $J$  = 3.2 Hz, 2H, NCH<sub>2</sub>), 5.16 (d,  $J$  = 2.8 Hz, 1H, CCH<sub>2</sub>), 4.58 (d,  $J$  = 3.6 Hz, 1H, CCH<sub>2</sub>), 2.90-2.80 (m, 4H, ArCH(CH<sub>3</sub>)<sub>2</sub>), 1.38 (d,  $J$  = 6.8 Hz, 6H, CH<sub>3</sub>), 1.29 (d,  $J$  = 6.8 Hz, 12H, CH<sub>3</sub>), 1.28 (d,  $J$  = 7.2 Hz, 6H, CH<sub>3</sub>); <sup>13</sup>C NMR (100 MHz, CDCl<sub>3</sub>)  $\delta$  = 160.1 (NCHN), 146.2 (ArC), 145.7 (ArC), 141.9 (ArC), 132.0 (ArC), 131.8 (ArC), 128.9 (ArC), 125.8 (ArC), 125.1 (ArC), 125.0 (CCH<sub>2</sub>), 96.3 (CCH), 57.8 (NCH<sub>2</sub>), 29.4 (ArCH), 29.3 (ArCH), 24.8 (CH<sub>3</sub>), 24.5 (CH<sub>3</sub>), 23.9 (CH<sub>3</sub>), 23.7 (CH<sub>3</sub>); IR (KBr):  $\nu$  (cm<sup>-1</sup>) 3070, 2964, 2872, 1612, 1465, 1329, 1282, 1253, 1156, 1030, 806, 637; HRMS (ESI):  $m/z$  [M-OTf]<sup>+</sup> calcd. for C<sub>28</sub>H<sub>39</sub>N<sub>2</sub><sup>+</sup>:403.3113, found: 403.3109.

Following the procedure **D**, **1b** (100 mg, 0.248 mmol) and AgOTf (64 mg, 0.248 mmol) afford the product **4a** in a 33% NMR yield.

Following the procedure **F**, **1a** (47 mg, 0.116 mmol), AgOTf (3 mg, 0.011 mmol), and HOTf (18 mg, 0.116 mmol) afford the product **4b** as pale yellow solid in the yield 95%. Mp: 299-301 °C; <sup>1</sup>H NMR (400 MHz, CDCl<sub>3</sub>) δ = 9.10 (d, *J* = 1.6 Hz, 1H, NCHN), 7.61 – 7.55 (m, 2H, ArH), 7.55 – 7.50 (m, 1H, NCH), 7.35 (d, *J* = 7.9 Hz, 2H, ArH), 7.30 (d, *J* = 7.8 Hz, 2H, ArH), 2.42 – 2.34 (m, 2H, ArCH(CH<sub>3</sub>)<sub>2</sub>), 2.30 – 2.22 (m, 2H, ArCH(CH<sub>3</sub>)<sub>2</sub>), 2.18 (s, 3H, CH<sub>3</sub>), 1.29 – 1.22 (m, 13H, CH<sub>3</sub>), 1.19 – 1.13 (m, 12H, CH<sub>3</sub>); <sup>13</sup>C NMR (100 MHz, CDCl<sub>3</sub>) δ = 145.2 (NCHN), 144.9 (NCH), 137.4 (ArC), 133.9 (ArC), 132.3 (ArC), 131.9 (ArC), 129.8 (ArC), 127.3 (ArC), 124.9 (ArC), 124.5 (ArC), 122.7 (ArC), 120.5 (q, *J*<sub>C-F</sub>=319 Hz), 29.03 (ArCH), 28.97 (ArCH), 24.70 (CH<sub>3</sub>), 24.36 (CH<sub>3</sub>), 23.75 (CH<sub>3</sub>), 23.06 (CH<sub>3</sub>), 9.37 (CH<sub>3</sub>); IR (KBr): ν (cm<sup>-1</sup>) 3085, 2965, 2872, 1637, 1538, 1465, 1329, 1254, 1153, 1030, 806, 776, 637; HRMS (ESI): *m/z* [M-OTf]<sup>+</sup> calcd. for C<sub>28</sub>H<sub>39</sub>N<sub>2</sub><sup>+</sup>:403.3108, found: 403.3105.

Following the procedure **G**, **1a** (56 mg, 0.138 mmol), Cu(OTf)<sub>2</sub> (5 mg, 0.013 mmol), and HOTf (21 mg, 0.138 mmol) afford the product **4b** in a 75% NMR yield.

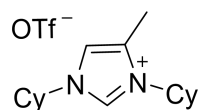

**5**

Following the procedure **C**, **1c** (100 mg, 0.407 mmol) and Cu(OTf)<sub>2</sub> (147 mg, 0.407 mmol) afford the product **5** in a 98% NMR yield. <sup>1</sup>H NMR (400 MHz, CDCl<sub>3</sub>) δ = 9.06 (s, 1H, NCHN), 7.15 (s, 1H, NCH), 4.43-4.29 (m, 1H, NCyH), 4.05-3.91 (m, 1H, NCyH), 2.34 (s, 3H, CH<sub>3</sub>), 2.20-1.15 (m, 22H, CyH); <sup>13</sup>C NMR (100 MHz, CDCl<sub>3</sub>) δ = 132.51 (NCHN), 130.52 (NCCH<sub>3</sub>), 120.5 (q, *J*<sub>C-F</sub>=319 Hz), 117.01 (NCH), 59.74 (NCyC), 57.62 (NCyC), 43.51 (CyC), 33.16 (CyC), 32.92 (CyC), 25.23 (CyC), 24.75 (CyC), 24.42 (CyC), 24.28 (CyC), 9.29 (CCH<sub>3</sub>); IR (KBr): ν (cm<sup>-1</sup>) 2935, 2859, 1645, 1555, 1454, 1262, 1157, 1029, 845, 635; HRMS (ESI): *m/z* [M-OTf]<sup>+</sup> calcd. for C<sub>16</sub>H<sub>27</sub>N<sub>2</sub><sup>+</sup>:247.2169, found:247.2168.

Following the procedure **D**, **1c** (100 mg, 0.407 mmol) and AgOTf (104 mg, 0.407 mmol) afford the product **5** as pale yellow oil (65 mg, 40%).



Following the procedure **E**, **1c** (100 mg, 0.407 mmol) and AgOTf (104 mg, 0.407 mmol) afford the product **5** as pale yellow oil (105 mg, 65%).

Following the procedure **F**, **1c** (47 mg, 0.194 mmol) and AgOTf (5 mg, 0.019 mmol), HOTf (29 mg, 0.194 mmol) afford the product **5** in a 83% NMR yield.

Following the procedure **G**, **1c** (47 mg, 0.193 mmol), Cu(OTf)<sub>2</sub> (7 mg, 0.019 mmol), and HOTf (29 mg, 0.193 mmol) afford the product **5** in a 85% NMR yield.

Following the procedure **H**, **1c** (30 mg, 0.121 mmol) and HOTf (18 mg, 0.121 mmol) afford the product **5** in a 86% NMR yield.

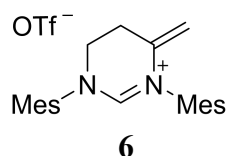

Following the procedure **C**, **1d** (70 mg, 0.210 mmol) and Cu(OTf)<sub>2</sub> (77 mg, 0.210 mmol) afford the product **6** as pale yellow oil (70 mg, 69%). <sup>1</sup>H NMR (400 MHz, CDCl<sub>3</sub>) δ = 7.90 (s, 1H, NCHN), 6.96 (s, 2H, ArH), 6.92 (s, 2H, ArH), 4.97 (s, 1H, CCH<sub>2</sub>), 4.52 (s, 1H, CCH<sub>2</sub>), 3.99 (s, 2H, CH<sub>2</sub>), 3.23 (s, 2H, CH<sub>2</sub>), 2.27 (s, 9H, ArCH<sub>3</sub>), 2.24 (s, 3H, ArCH<sub>3</sub>), 2.19 (s, 6H, ArCH<sub>3</sub>); <sup>13</sup>C NMR (100 MHz, CDCl<sub>3</sub>) δ = 152.6 (NCHN), 141.1 (ArC), 140.8 (ArC), 135.8 (CCH<sub>2</sub>), 135.0 (ArC), 134.9 (ArC), 133.6 (ArC), 132.7 (ArC), 130.2 (ArC), 130.1 (ArC), 120.5 (q, J<sub>C-F</sub>=319 Hz), 105.1 (CCH<sub>2</sub>), 47.9 (NCH<sub>2</sub>), 25.2 (NCH<sub>2</sub>CH<sub>2</sub>), 21.0 (CH<sub>3</sub>), 20.9 (CH<sub>3</sub>), 17.6 (CH<sub>3</sub>), 17.2 (CH<sub>3</sub>); IR (KBr): ν (cm<sup>-1</sup>) 2920, 2850, 1659, 1639, 1480, 1372, 1333, 1261, 1145, 1030, 854, 637; HRMS (ESI): m/z [M-OTf]<sup>+</sup> calcd. for C<sub>23</sub>H<sub>29</sub>N<sub>2</sub><sup>+</sup>:333.2325, found: 333.2325.

Following the procedure **D**, **1d** (100 mg, 0.301 mmol) and AgOTf (78 mg, 0.301 mmol) afford the product **6** in a 83% NMR yield.

Following the procedure **F**, **1d** (65 mg, 0.194 mmol) and AgOTf (5 mg, 0.019 mmol), HOTf (29 mg, 0.194 mmol) afford the product **6** in a 44% NMR yield.

Following the procedure **G**, **1d** (46 mg, 0.138 mmol) and Cu(OTf)<sub>2</sub> (5 mg, 0.013 mmol), HOTf (21 mg, 0.138 mmol) afford the product **6** in a 17% NMR yield.

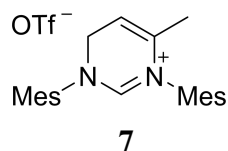

Following the procedure **C**, **2a** (100 mg, 0.301 mmol) and Cu(OTf)<sub>2</sub> (109 mg, 0.301 mmol) afford the product **7** as pale yellow solid (113mg, 78%). Mp: 169-171 °C; <sup>1</sup>H NMR (400 MHz, CDCl<sub>3</sub>) δ = 7.88 (s, 1H, NCHN), 6.99 (s, 4H, ArH), 5.53 (s, 1H, CCH), 4.60 (s, 2H, NCH<sub>2</sub>), 2.40 (s, 6H, ArCH<sub>3</sub>), 2.32 (s, 6H, ArCH<sub>3</sub>), 2.31 (s, 3H, ArCH<sub>3</sub>), 2.29 (s, 3H, ArCH<sub>3</sub>), 1.61 (s, 3H, CH<sub>3</sub>); <sup>13</sup>C NMR (100 MHz, CDCl<sub>3</sub>) δ = 154.3 (NCHN), 141.2 (ArC), 141.0 (ArC), 135.2 (ArC), 134.6 (ArC), 133.4 (ArC), 132.0 (ArC), 131.8 (ArC), 130.4 (ArC), 130.0 (ArC), 120.6 (q, J<sub>C-F</sub>=319 Hz), 105.2 (NCH<sub>2</sub>CH), 49.0 (NCH<sub>2</sub>), 21.0 (ArCH<sub>3</sub>), 20.9 (ArCH<sub>3</sub>), 17.7 (ArCH<sub>3</sub>), 17.3 (ArCH<sub>3</sub>), 17.1 (CCH<sub>3</sub>); IR (KBr): ν (cm<sup>-1</sup>) 3038, 2923, 2856, 1706, 1635, 1442, 1339, 1259, 1148, 1029, 856, 636, 572; HRMS (ESI): m/z [M-OTf]<sup>+</sup> calcd. for C<sub>23</sub>H<sub>29</sub>N<sub>2</sub><sup>+</sup>: 333.2331, found: 333.2339.

Following the procedure **D**, **2a** (100 mg, 0.301 mmol) and AgOTf (78 mg, 0.301 mmol) afford the product **7** as pale yellow solid (105 mg, 72%).

Following the procedure **F**, **2a** (52 mg, 0.155 mmol), AgOTf (4 mg, 0.015 mmol), and HOTf (23 mg, 0.155 mmol) afford the product **7** in a 82% NMR yield.

Following the procedure **G**, **2a** (46 mg, 0.138 mmol), Cu(OTf)<sub>2</sub> (5 mg, 0.013 mmol), and HOTf (21 mg, 0.138 mmol) afford the product **7** in a 15% NMR yield.

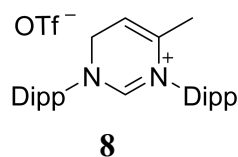

Following the procedure **C**, **2b** (100 mg, 0.240 mmol) and Cu(OTf)<sub>2</sub> (87 mg, 0.240 mmol) afford the product **8** as pale yellow solid (85 mg, 62%). Mp: 238-239 °C; <sup>1</sup>H NMR (400 MHz, CDCl<sub>3</sub>) δ = 7.54 (s, 1H, NCHN), 7.50 (d, J = 8.0 Hz, 1H, ArH), 7.47 (d, J = 8.4 Hz, 1H, ArH), 7.30 (d, J = 2.0 Hz, 2H, ArH), 7.28 (d, J = 1.6 Hz, 2H, ArH), 5.80 (s, 1H, CCH), 4.72 (s, 2H, NCH<sub>2</sub>), 3.20-3.07 (m, 4H, ArCH(CH<sub>3</sub>)<sub>2</sub>), 1.65 (s, 3H, CH<sub>3</sub>), 1.41 (d, J = 6.8 Hz, 6H, CH<sub>3</sub>), 1.37 (d, J = 6.8 Hz, 6H, CH<sub>3</sub>), 1.27 (d, J = 7.2 Hz, 6H, CH<sub>3</sub>), 1.25 (d, J = 7.2 Hz, 6H, CH<sub>3</sub>); <sup>13</sup>C NMR (100 MHz, CDCl<sub>3</sub>) δ = 152.6 (NCHN), 146.1 (ArC), 144.7 (ArC), 133.7 (ArC), 132.0 (ArC), 131.8 (ArC), 131.1 (ArC), 125.8 (ArC), 125.3 (ArC), 120.7 (q,

$J_{C-F}$ =319 Hz), 106.3 (NCH<sub>2</sub>CH), 51.7 (NCH<sub>2</sub>), 28.9 (ArCH), 28.8 (ArCH), 25.3 (CH<sub>3</sub>), 25.0 (CH<sub>3</sub>), 24.8 (CH<sub>3</sub>), 23.3 (CH<sub>3</sub>), 17.7 (CH<sub>3</sub>); IR (KBr):  $\nu$  (cm<sup>-1</sup>) 3068, 2965, 2873, 1708, 1632, 1465, 1392, 1325, 1258, 1150, 1032, 806, 757, 637; HRMS (ESI):  $m/z$  [M-OTf]<sup>+</sup> calcd. for C<sub>29</sub>H<sub>41</sub>N<sub>2</sub><sup>+</sup>: 417.3270, found: 417.3272.

Following the procedure **D**, **2b** (50 mg, 0.120 mmol) and AgOTf (31 mg, 0.120 mmol) afford the product **8** in a 91% NMR yield.

Following the procedure **F**, **2b** (49 mg, 0.116 mmol), AgOTf (3 mg, 0.011 mmol), and HOTf (18 mg, 0.116 mmol) afford the product **8** in a 82% NMR yield.

Following the procedure **G**, **2b** (57 mg, 0.138 mmol), Cu(OTf)<sub>2</sub> (5 mg, 0.013 mmol), and HOTf (21 mg, 0.138 mmol) afford the product **8** in a 73% NMR yield.

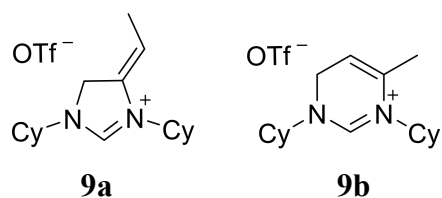

Following the procedure **D**, **2c** (100 mg, 0.384 mmol) and AgOTf (139 mg, 0.384 mmol) afford the product **9a** as pale yellow oil (55 mg, 35%). <sup>1</sup>H NMR (400 MHz, CDCl<sub>3</sub>)  $\delta$  = 8.80 (s, 1H, NCHN), 5.06-5.00 (m, 1H, NCyH), 4.52 (t,  $J$ =3.2 Hz, 2H, NCH<sub>2</sub>), 3.97-3.95 (m, 1H, CCH), 3.83-3.77 (m, 1H, NCyH), 2.13-2.09 (m, 2H, CyH), 2.00-1.95 (m, 4H, CH<sub>3</sub>), 1.89-1.75 (m, 5H, CyH), 1.72-1.63 (m, 4H, CyH), 1.45-1.40 (m, 4H, CyH), 1.34-1.25 (m, 4H, CyH); <sup>13</sup>C NMR (100 MHz, CDCl<sub>3</sub>)  $\delta$  = 150.2 (NCHN), 132.2 (NCH<sub>2</sub>CH), 120.5 (q,  $J_{C-F}$ =319 Hz), 103.2 (NCCH<sub>3</sub>), 64.5 (NCyC), 58.6 (NCyC), 40.8 (NCH<sub>2</sub>), 32.2 (CyC), 29.2 (CyC), 25.4 (CyC), 24.5 (CyC), 24.3 (CyC), 23.9 (CyC), 17.2 (CCH<sub>3</sub>); IR (KBr):  $\nu$  (cm<sup>-1</sup>) 2834, 2858, 1709, 1641, 1452, 1352, 1256, 1154, 1030, 894, 638; HRMS (ESI):  $m/z$  [M-OTf]<sup>+</sup> calcd. for C<sub>17</sub>H<sub>29</sub>N<sub>2</sub><sup>+</sup>: 261.2325, found: 261.2325.

Following the procedure **E**, **2c** (100 mg, 0.384 mmol) and AgOTf (99 mg, 0.384 mmol) afford the product **9b** as pale yellow oil (83 mg, 53%). <sup>1</sup>H NMR (400 MHz, CDCl<sub>3</sub>)  $\delta$  = 8.12 (s, 1H, NCHN), 4.94 (s, 1H, CCH), 4.03 (s, 2H, NCH<sub>2</sub>), 3.80 (t,  $J$  = 11.6 Hz, 1H, NCyH), 3.42 (t,  $J$  = 12.0 Hz, 1H, NCyH), 1.87 (s, 3H, CH<sub>3</sub>), 1.80-1.71 (m, 9H, CyH), 1.66-1.64 (m, 2H, CyH), 1.52-1.35 (m, 6H, CyH), 1.24-1.15 (m, 3H, CyH); <sup>13</sup>C NMR (100 MHz, CDCl<sub>3</sub>)  $\delta$  = 155.5 (NCHN), 132.1 (NCCH<sub>2</sub>), 120.5 (q,  $J_{C-F}$  = 318 Hz), 103.5 (CCH), 58.4 (NCyC), 57.5

(NCyC), 51.7 (NCH<sub>2</sub>), 33.6 (CyC), 32.4 (CyC), 30.7 (CyC), 25.2 (CyC), 24.5 (CyC), 24.4 (CyC), 24.3 (CyC), 10.9 (CCH<sub>3</sub>); IR (KBr):  $\nu$  (cm<sup>-1</sup>) 2936, 2859, 1709, 1643, 1454, 1355, 1311, 1258, 1157, 1032, 870, 636; HRMS (ESI):  $m/z$  [M-OTf]<sup>+</sup> calcd. for C<sub>17</sub>H<sub>29</sub>N<sub>2</sub><sup>+</sup>:261.2325, found: 261.2324.

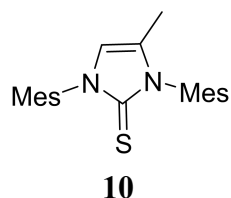

A Schlenk tube was charged with **3** (50 mg, 0.106 mmol), <sup>t</sup>BuOK (15.7 mg, 0.14 mmol), S<sub>8</sub> (7 mg, 0.212 mmol), evacuated and backfilled with N<sub>2</sub>. Dried THF was successively added. The mixture was then stirred at room temperature for 2 h. When the reaction was completed (monitored by TLC), the solvent was evacuated in vacuo, and the residue was purified by column chromatography on silica gel (PE/EA = 10:1) to give the product **10** as pale yellow powder (19 mg, 49%). Mp: 252-253 °C; <sup>1</sup>H NMR (400 MHz, CDCl<sub>3</sub>)  $\delta$  = 7.00 (d,  $J$  = 12.1 Hz, 4H, ArH), 6.53 (s, 1H, NCH), 2.33 (d,  $J$  = 5.9 Hz, 6H, CH<sub>3</sub>), 2.12 (d,  $J$  = 11.7 Hz, 12H, CH<sub>3</sub>), 1.91 (d,  $J$  = 1.1 Hz, 3H, CH<sub>3</sub>). <sup>13</sup>C NMR (100 MHz, CDCl<sub>3</sub>)  $\delta$  = 162.5 (SC), 139.1 (ArC), 138.9 (ArC), 135.8 (ArC), 135.6 (ArC), 133.6 (ArC), 131.6 (ArC), 129.3 (ArC), 129.1 (ArC), 126.2 (NCH), 114.1 (NCCH<sub>3</sub>), 29.6 (CH<sub>3</sub>), 21.1 (CH<sub>3</sub>), 21.1 (CH<sub>3</sub>), 17.8 (CH<sub>3</sub>), 17.6 (CH<sub>3</sub>), 10.4 (CH<sub>3</sub>); IR (KBr):  $\nu$  (cm<sup>-1</sup>) 2917, 2853, 1674, 1486, 1397, 1357, 1199, 1035, 1009, 860, 758, 637; HRMS (ESI):  $m/z$  [M + Na]<sup>+</sup> calcd. for C<sub>22</sub>H<sub>26</sub>N<sub>2</sub>NaS<sup>+</sup>: 373.1709, found: 373.1707.

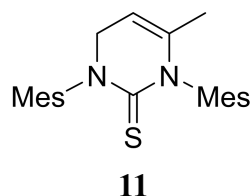

KHMDS (1.0 M in hexane, 0.124 mL, 0.124 mmol) was added drop wise to a solution of **7a** (50 mg, 0.103 mmol) and S<sub>8</sub> (5mg, 0.206 mmol) in THF (2 mL) at -78 °C. After 30 minutes, the mixture was warmed to room temperature, and stirred for 2 h. The solvent was

evacuated in vacuum, and the residue was purified by column chromatography on silica gel (PE/EA = 10:1) to give the product **11** as pale yellow powder (33 mg, 79%). Mp: 202-203 °C; <sup>1</sup>H NMR (400 MHz, CDCl<sub>3</sub>) δ = 6.92 (s, 2H, ArH), 6.89 (s, 2H, ArH), 4.93-4.92 (m, 1H, CCH), 4.17 (dd, *J* = 3.2 Hz, 2.0 Hz, 2H, NCH<sub>2</sub>), 2.32 (s, 6H, ArCH<sub>3</sub>), 2.28 (s, 3H, ArCH<sub>3</sub>), 2.27 (s, 3H, ArCH<sub>3</sub>), 2.26 (s, 6H, ArCH<sub>3</sub>), 1.43 (s, 3H, CH<sub>3</sub>); <sup>13</sup>C NMR (100 MHz, CDCl<sub>3</sub>) δ = 176.7 (NCHN), 140.7 (ArC), 137.3 (ArC), 137.2 (ArC), 136.9 (ArC), 136.1 (ArC), 134.1 (ArC), 134.0 (ArC), 129.6 (ArC), 128.8 (ArC), 97.3 (NCH<sub>2</sub>CH), 48.3 (NCH<sub>2</sub>), 21.1 (CH<sub>3</sub>), 21.0 (CH<sub>3</sub>), 20.2 (CH<sub>3</sub>), 17.8 (CH<sub>3</sub>), 17.2 (CH<sub>3</sub>); IR (KBr): ν (cm<sup>-1</sup>) 2915, 2853, 1702, 1490, 1449, 1355, 1314, 1278, 1225, 1046, 849, 732; HRMS(ESI): *m/z* [M+H]<sup>+</sup> calcd. for C<sub>23</sub>H<sub>29</sub>N<sub>2</sub>S<sup>+</sup>:365.2051, found: 365.2047.

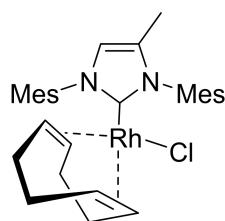

**12**

KHMDS (1.0 M in hexane, 0.39 mL, 0.39 mmol) was added drop wise to a solution of **3** (50 mg, 0.106 mmol) and [Rh(cod)Cl]<sub>2</sub> (27.1 mg, 0.05 mmol) in THF (3 mL) at -78 °C. After 30 minutes, the mixture was warmed to room temperature and stirred for 2 h. The solvent was evacuated in vacuo, and the residue was purified by column chromatography on silica gel (PE/EA = 25:1) to give the product as an orange product (28 mg, 43%). <sup>1</sup>H NMR (400 MHz, CDCl<sub>3</sub>) δ = 7.07 (s, 2H, ArH), 7.02 (s, 1H, ArH), 6.99 (s, 1H, ArH), 6.69 (s, 1H, NCH), 4.45 (d, *J* = 11.6 Hz, 2H, CHCH), 3.31 (d, *J* = 13.6 Hz, 2H, CHCH), 2.42 (s, 2H), 2.38 (m, 4H), 2.33 (d, *J* = 8.4 Hz, 2H), 2.07 (s, 3H), 2.05 (s, 3H), 1.87 (s, 3H), 1.82 (s, 3H), 1.55 (s, 9H); <sup>13</sup>C NMR (100 MHz, CDCl<sub>3</sub>) δ = 183.0 (d, *J* = 51.9 Hz, NCRh), 165.5 (ArC), 163.9 (ArC), 138.4 (ArC), 138.0 (ArC), 137.5 (ArC), 136.4 (ArC), 134.5 (ArC), 134.0 (ArC), 131.0 (ArC), 129.6 (CHCH), 128.4 (CHCH), 125.6 (ArC), 120.4 (NCCH<sub>3</sub>), 95.8 (NCH), 67.5, 54.3, 33.0, 32.4, 28.4, 21.2, 21.1, 18.8, 17.6, 9.7; IR (KBr): ν (cm<sup>-1</sup>) 2921, 2852, 1678, 1608, 1482, 1377, 1282, 1154, 1031, 851, 657; HRMS (EI): *m/z* [M]<sup>+</sup> calcd. for C<sub>30</sub>H<sub>38</sub>N<sub>2</sub>ClRh<sup>+</sup>:564.1773, found: 564.1777.

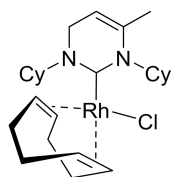

### 13

KHMDS (1.0 M in hexane, 0.39 mL, 0.39 mmol) was added drop wise to a solution of **9b** (140 mg, 0.34 mmol) and  $[\text{Rh}(\text{cod})\text{Cl}]_2$  (92 mg, 0.17 mmol) in THF (5 mL) at  $-78\text{ }^\circ\text{C}$ . After 30 minutes, the mixture was warmed to room temperature and stirred for 2 h. The solvent was evacuated in vacuo, and the residue was purified by column chromatography on silica gel (PE/EA = 25:1) to give the product **13** as an orange product (30 mg, 17%).  $^1\text{H}$  NMR (400 MHz,  $\text{CDCl}_3$ )  $\delta$  = 6.41-6.34 (m, 1H, NCyH), 6.30-6.23 (m, 1H, NCyH), 4.91 (s, 2H, CHCH), 4.59 (m, 1H, CCH), 3.53-3.51 (m, 2H, NCH<sub>2</sub>), 3.37 (m, 2H, CHCH), 2.40-2.31 (m, 5H), 2.21-2.10 (m, 2H), 1.97-1.94 (m, 3H), 1.91 (s, 3H, CH<sub>3</sub>), 1.88-1.82 (m, 5H), 1.79-1.73 (m, 3H), 1.67-1.55 (m, 7H), 1.37-1.30 (m, 1H), 1.16-1.08 (m, 2H);  $^{13}\text{C}$  NMR (100 MHz,  $\text{CDCl}_3$ )  $\delta$  = 211.3 (d,  $J$  = 46.1 Hz, NCRh), 134.9 (CHCH), 102.6 (NCCH<sub>3</sub>), 96.1 (NCH<sub>2</sub>C), 68.3 (NCyC), 67.3 (NCyC), 65.1 (NCH<sub>2</sub>), 39.46, 34.07, 33.16, 32.38, 31.89, 30.84, 30.65, 29.67, 29.33, 29.29, 29.18, 29.00, 28.59, 27.61, 27.18, 26.85, 26.13, 25.94, 22.66, 21.58, 14.08; IR (KBr):  $\nu$  ( $\text{cm}^{-1}$ ) 2923, 2851, 1694, 1658, 1497, 1449, 1358, 1261, 1089, 1022, 800, 641; HRMS(ESI):  $m/z$   $[\text{M}-\text{Cl}+\text{CH}_3\text{CN}]^+$  calcd. for  $\text{C}_{27}\text{H}_{43}\text{N}_3^+$ : 512.2507, found: 512.2500.

### Reference:

1. S. Urban, M. Tursky, R. Fröhlich and F. Glorius, *Dalton Trans.*, 2009, 6934.

**NMR spectra:  
compound 1a**

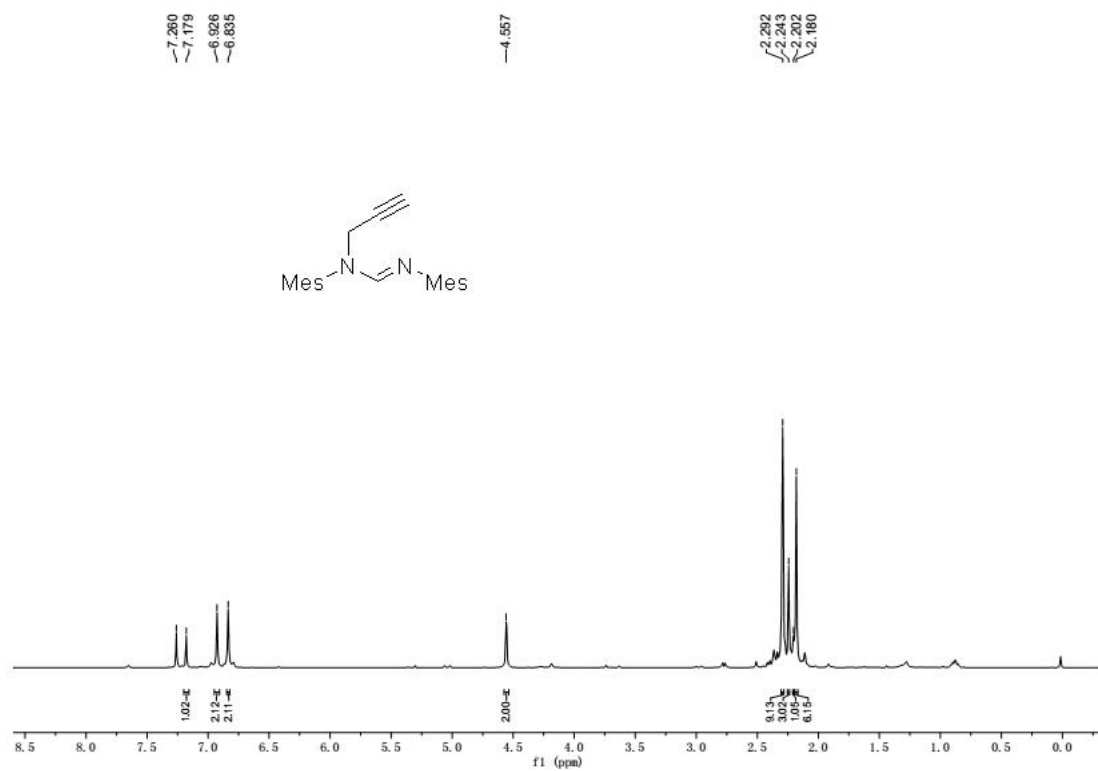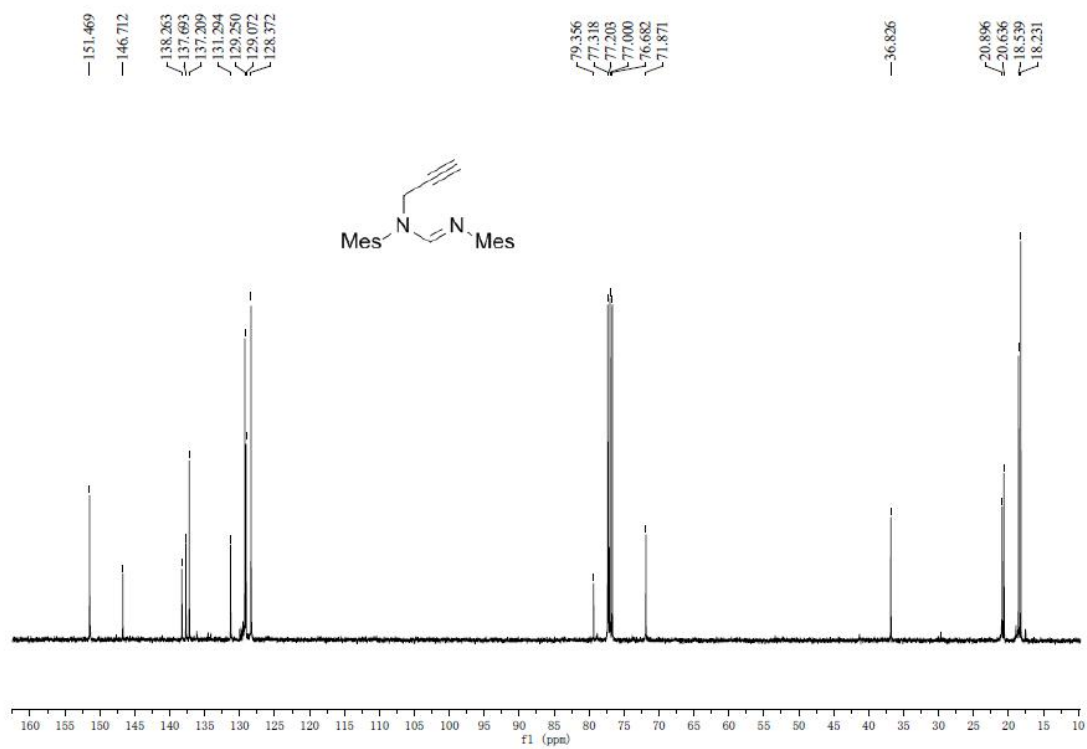

compound 1b

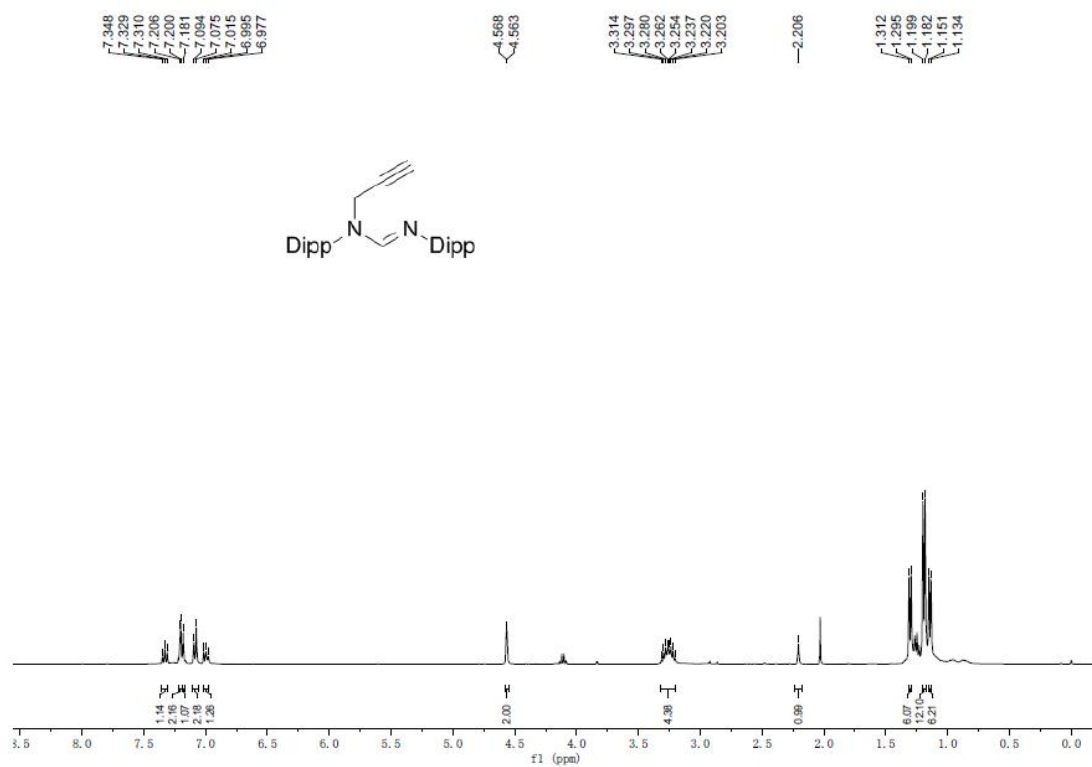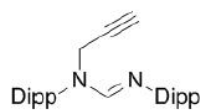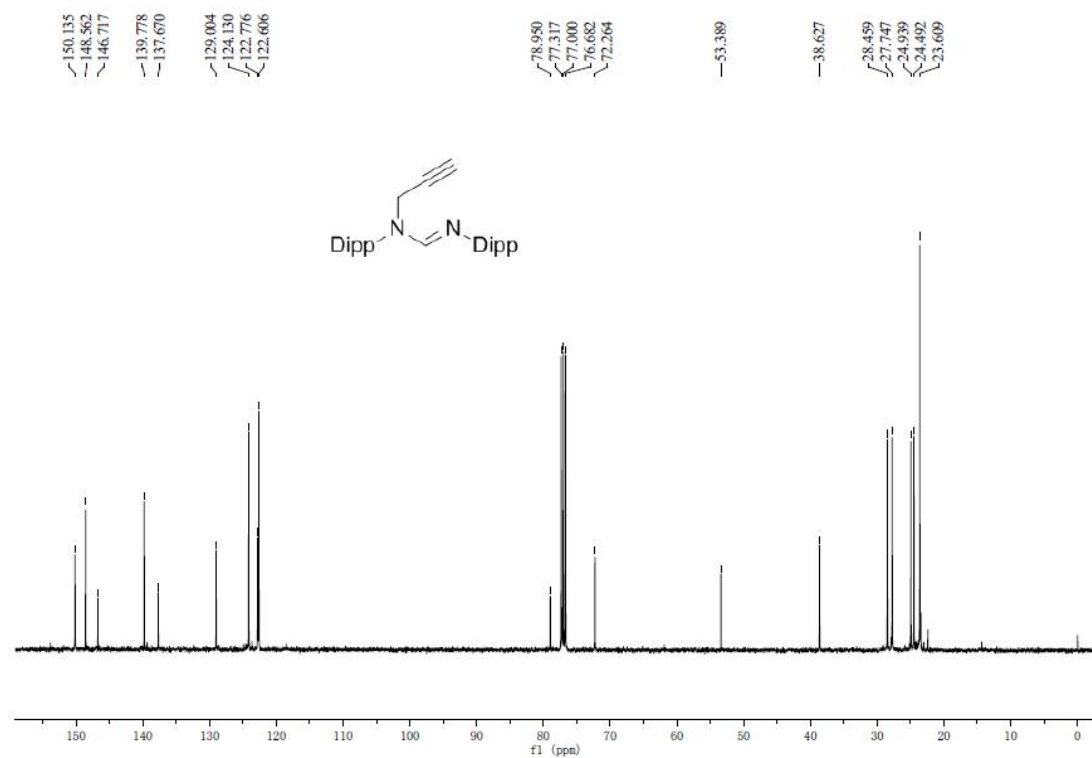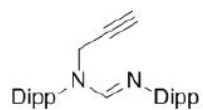



# compound 1c

7.448  
7.260  
4.048  
4.042  
3.262  
3.233  
3.203  
2.870  
2.859  
2.849  
2.111  
2.105  
1.845  
1.840  
1.787  
1.749  
1.718  
1.640  
1.481  
1.632  
1.610  
1.477  
1.469  
1.446  
1.439  
1.346  
1.308  
1.275  
1.014  
-0.014

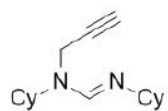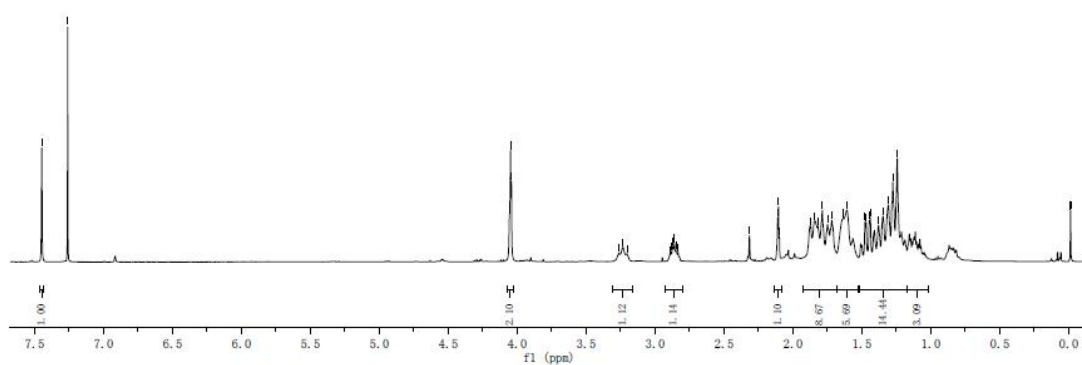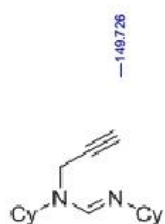

148.726  
81.081  
77.319  
77.210  
77.000  
76.681  
69.926  
64.379  
68.102  
35.552  
34.481  
32.686  
31.535  
29.210  
25.546  
25.308  
25.173  
25.132  
24.864  
24.573

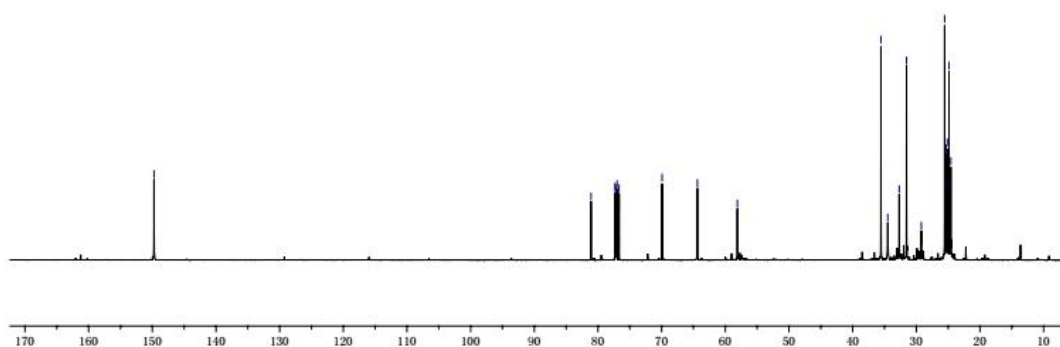

# compound 1d

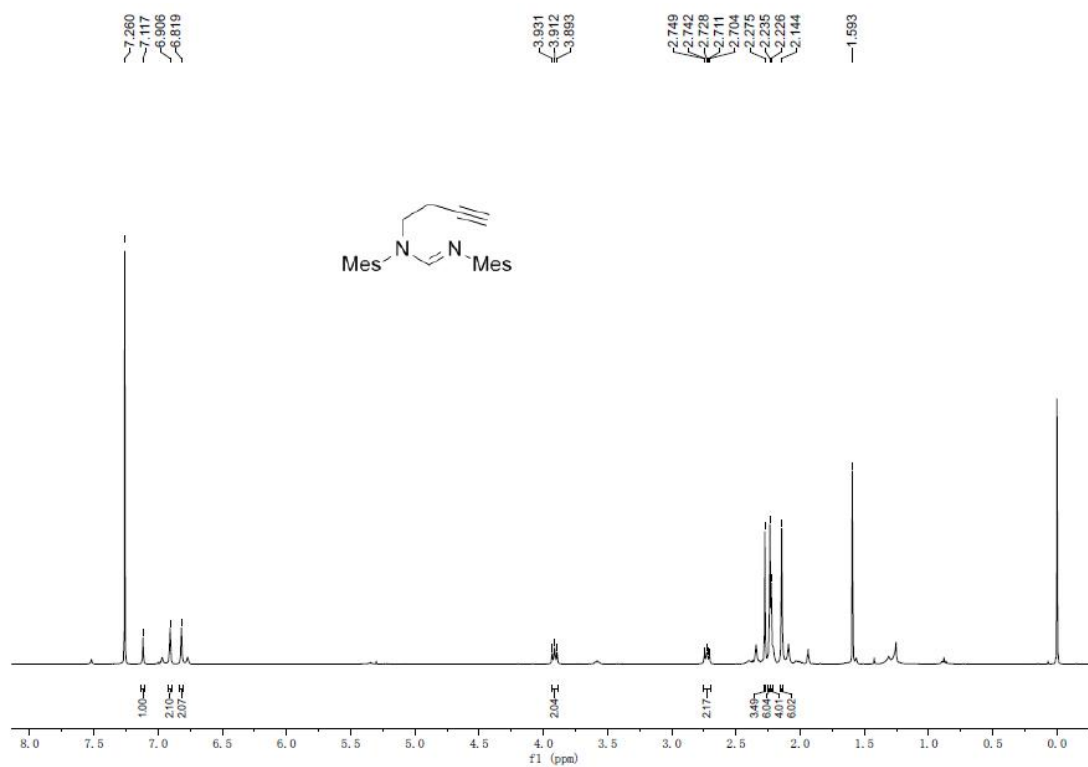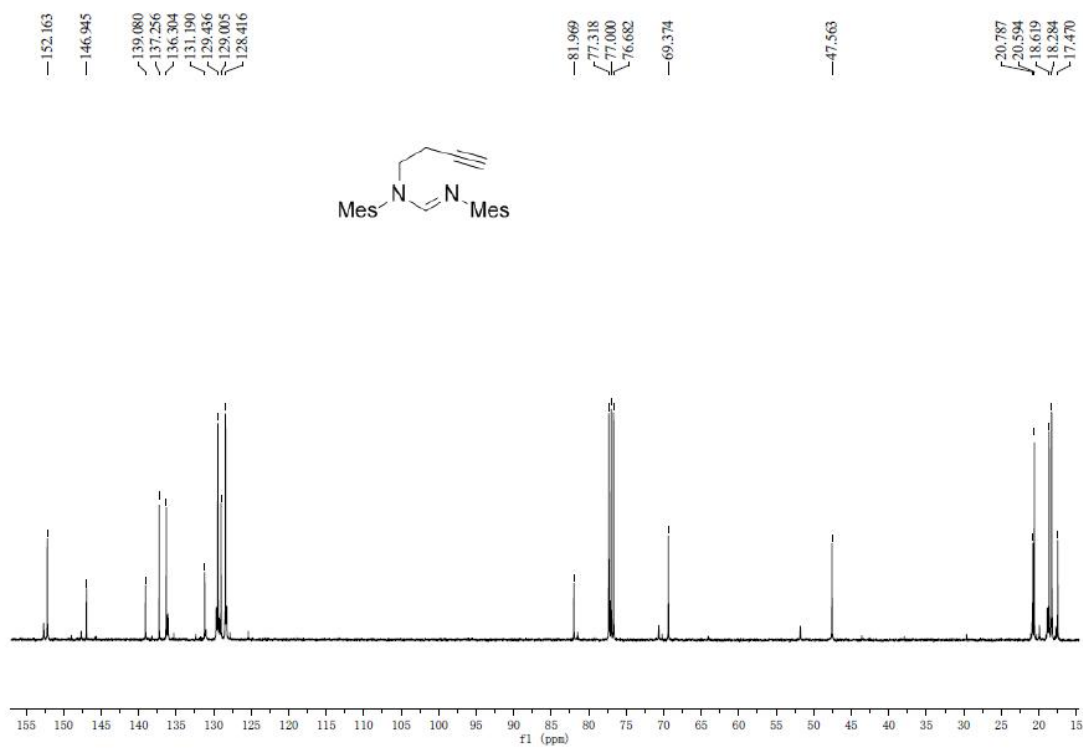

compound 2a

7.129  
6.897  
6.811

4.462  
4.457

2.268  
2.223  
2.164  
1.755

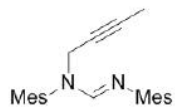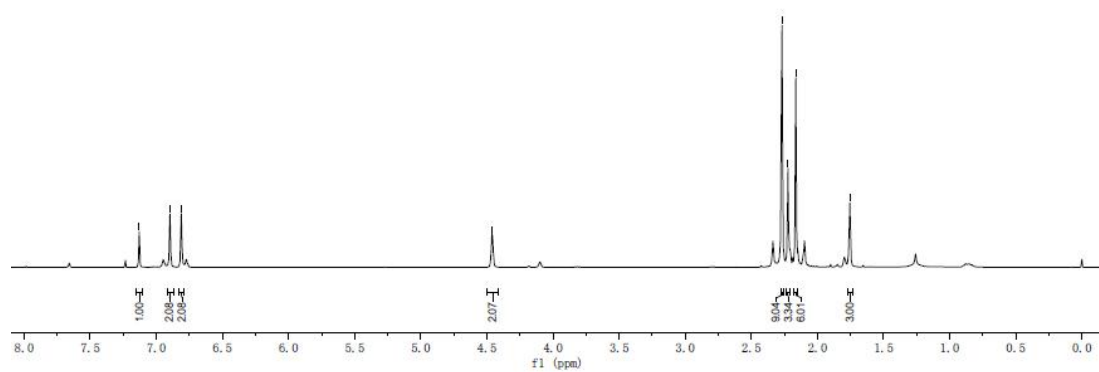

151.508  
146.987  
138.606  
137.603  
137.156  
131.114  
129.155  
129.118  
128.302

79.301  
77.318  
77.000  
76.683  
74.538

37.281

20.864  
20.624  
18.479  
18.155

3.443

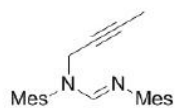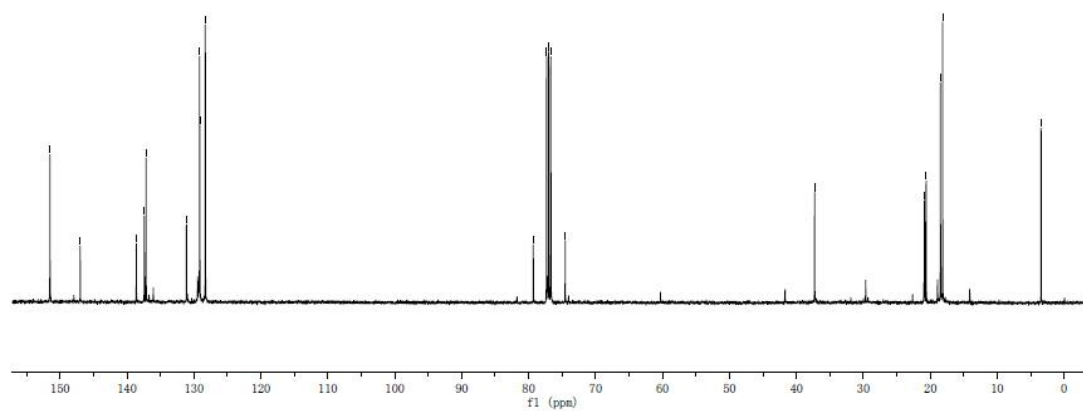

compound 2b

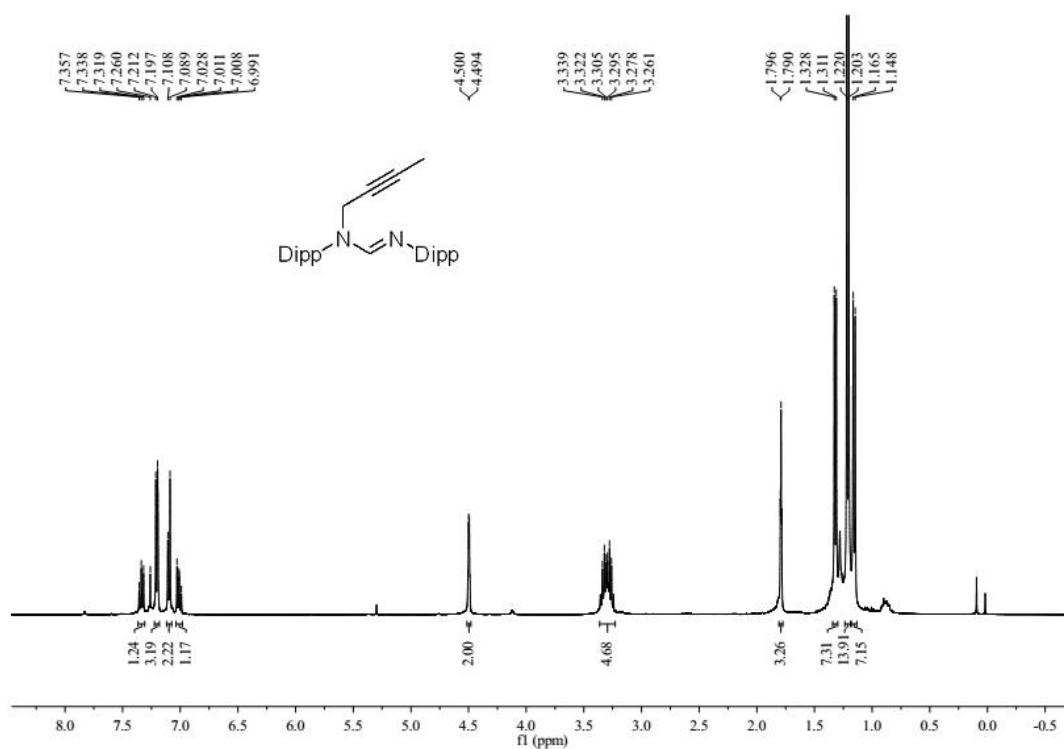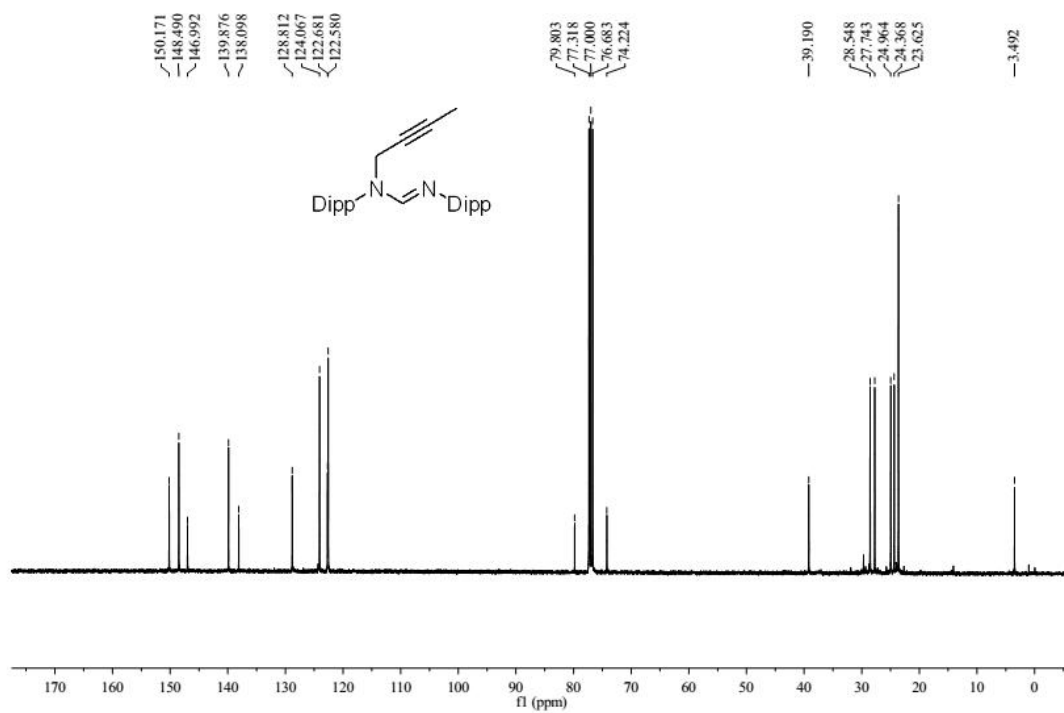

compound 2c

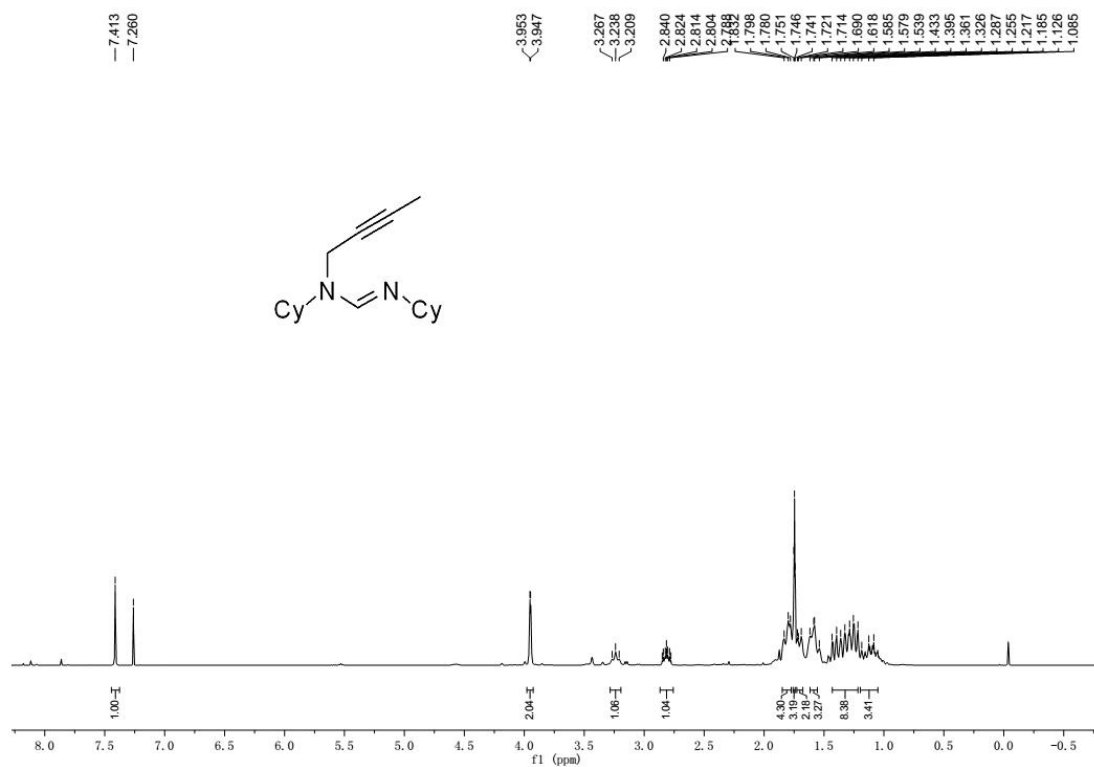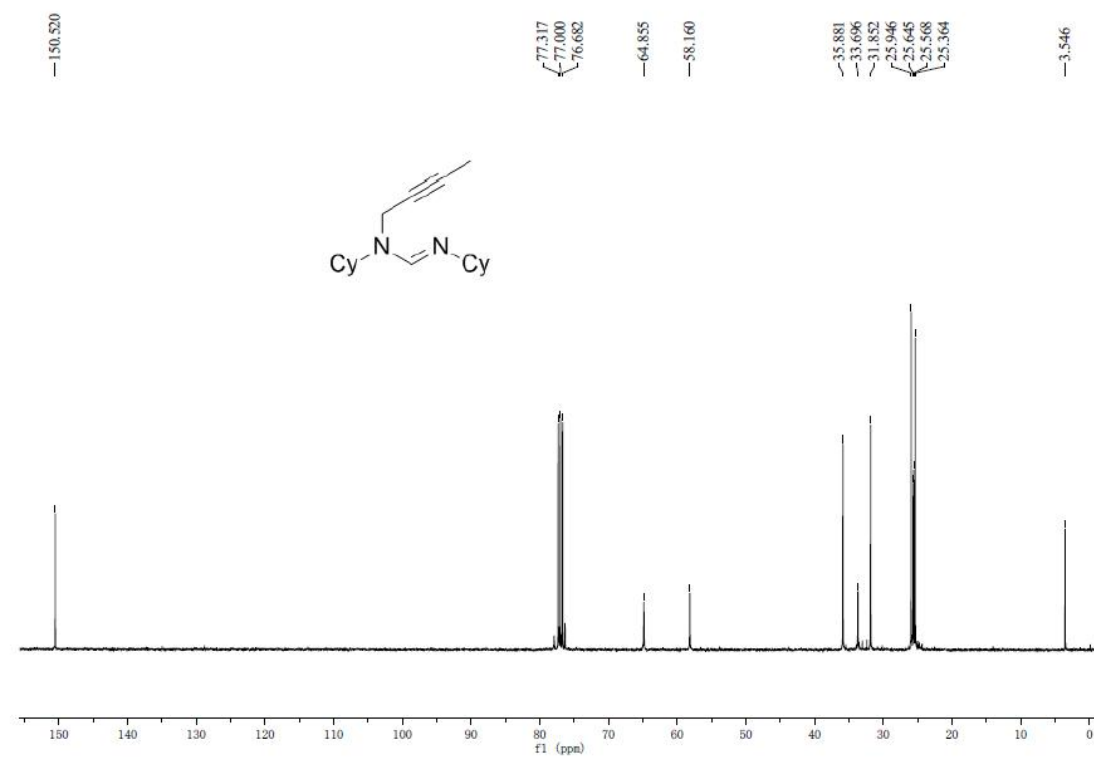

# compound 3a

u-wwj-8141

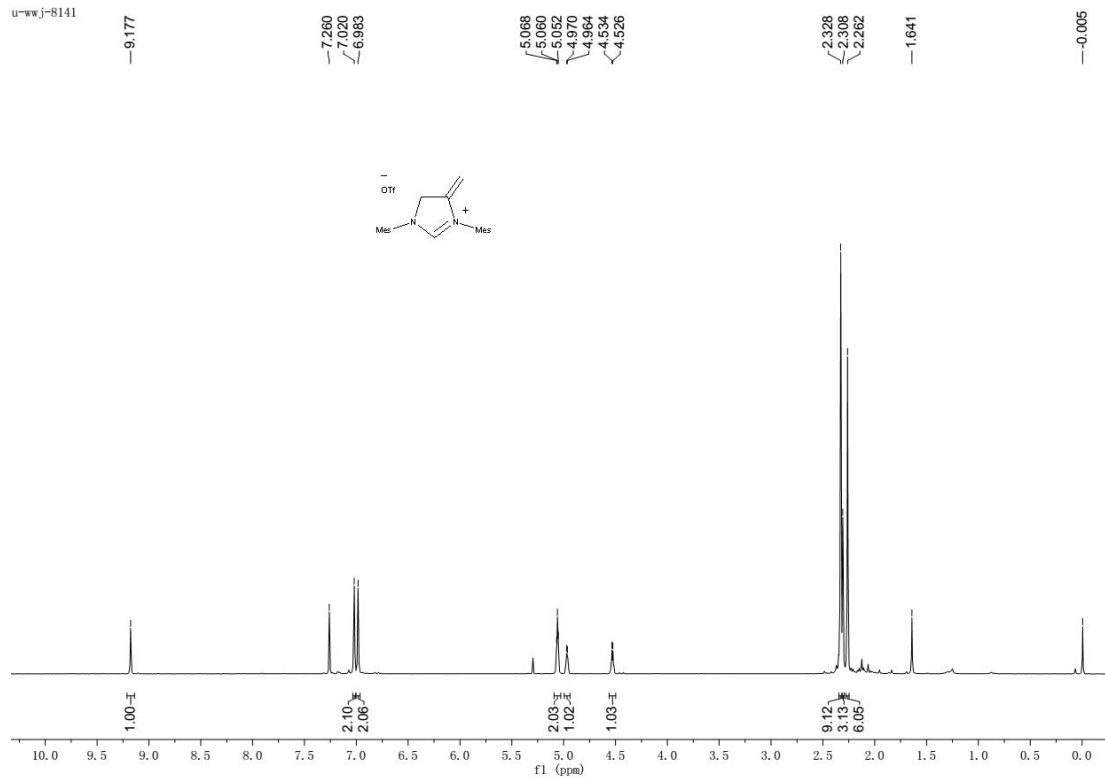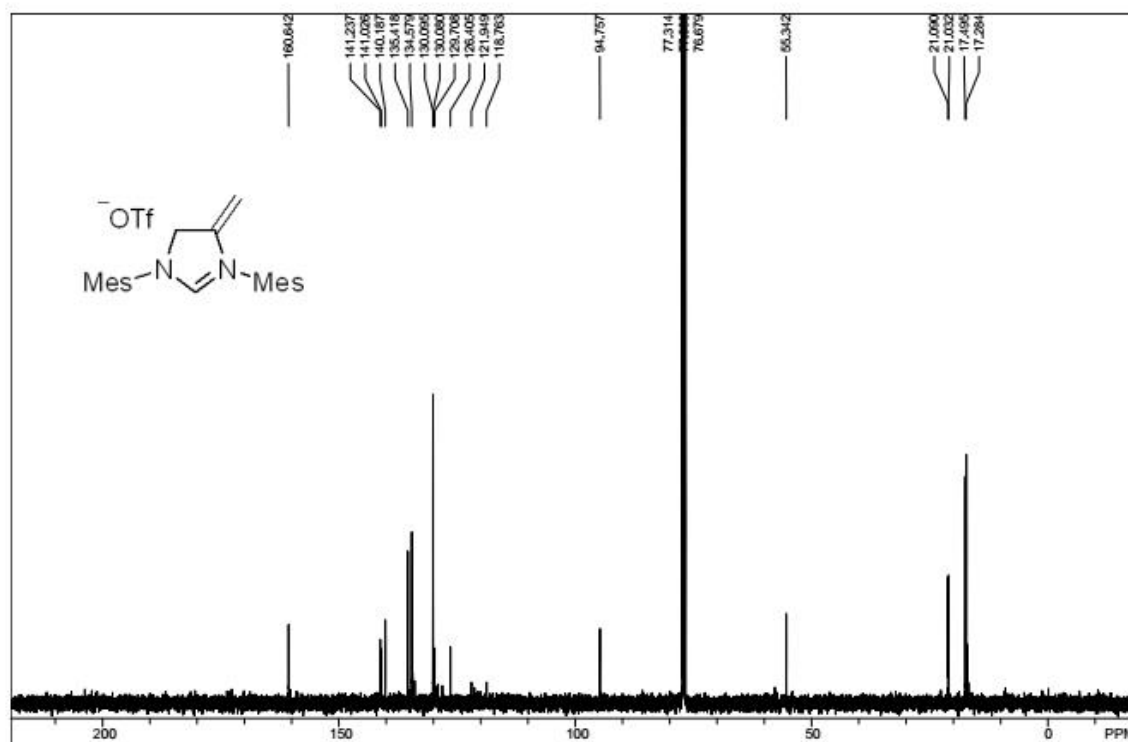

compound 3b

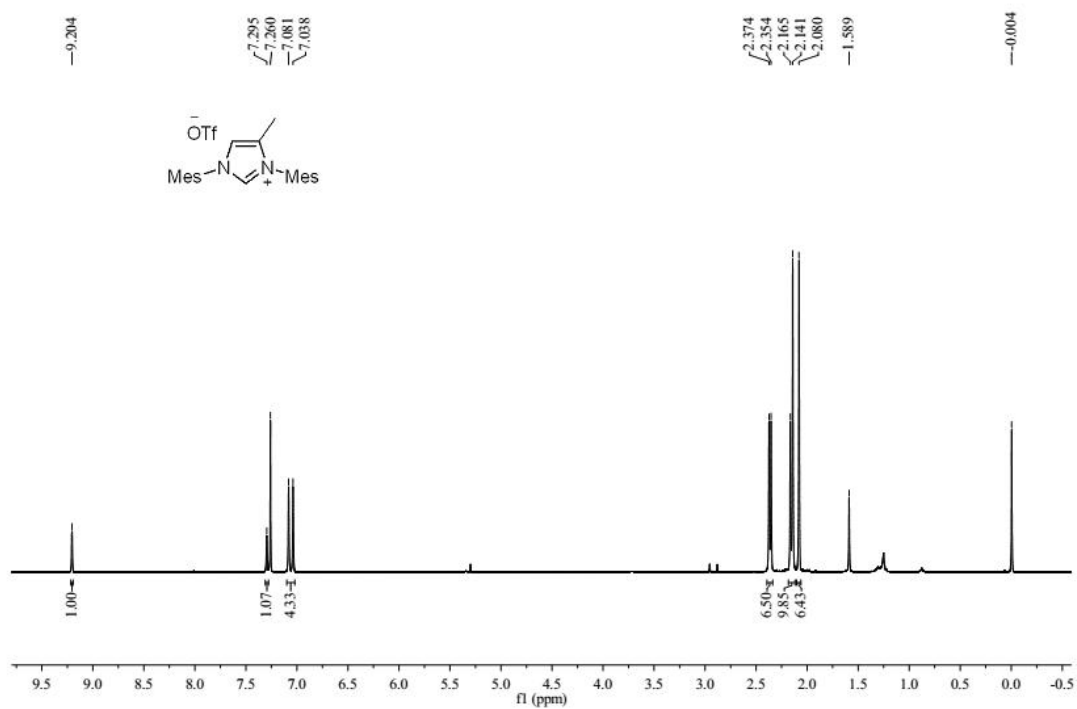

compound 4a

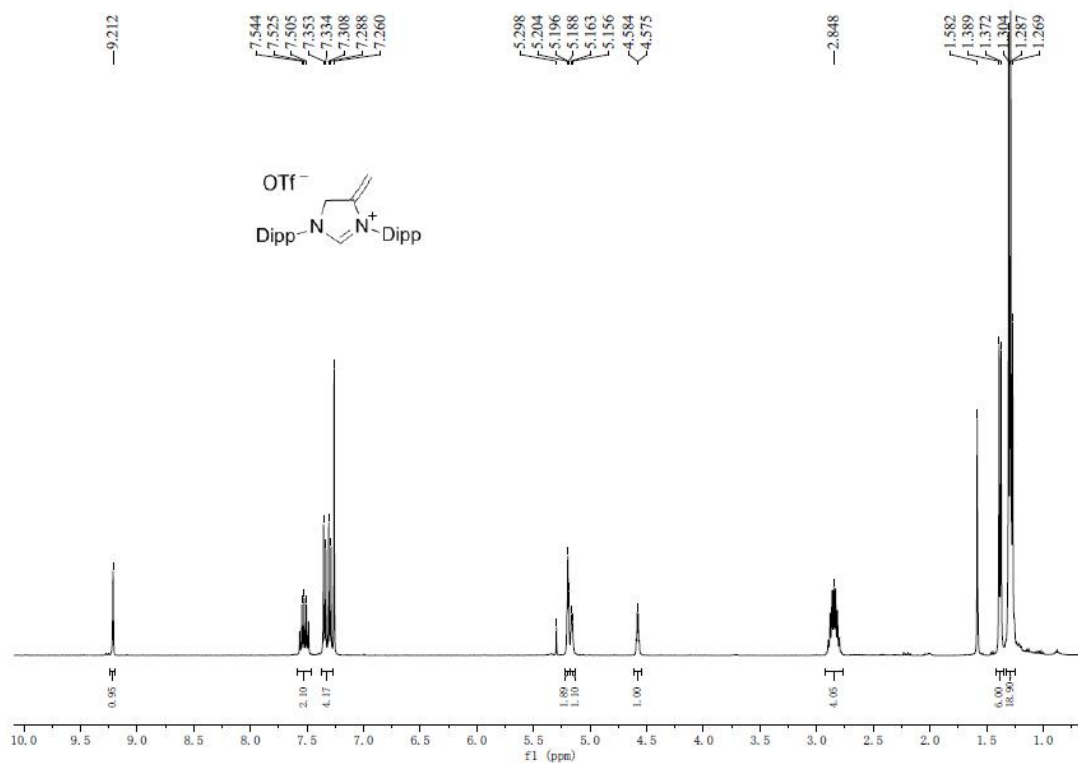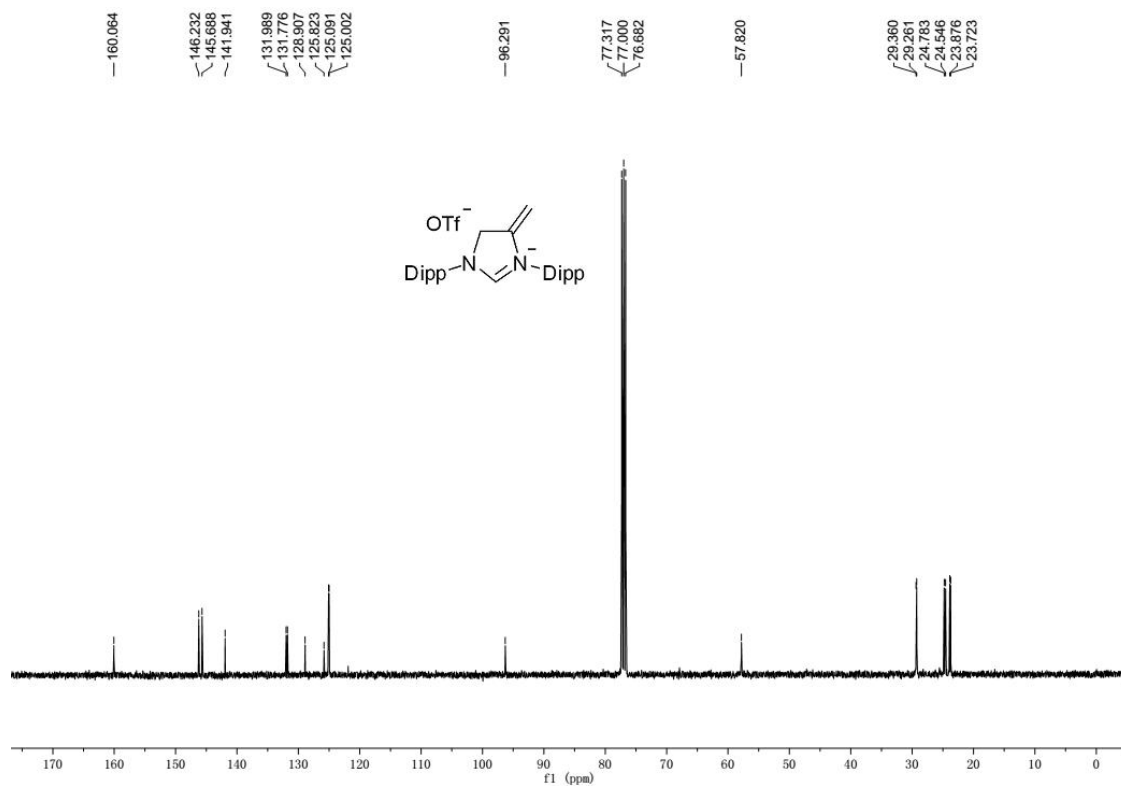



compound 4b

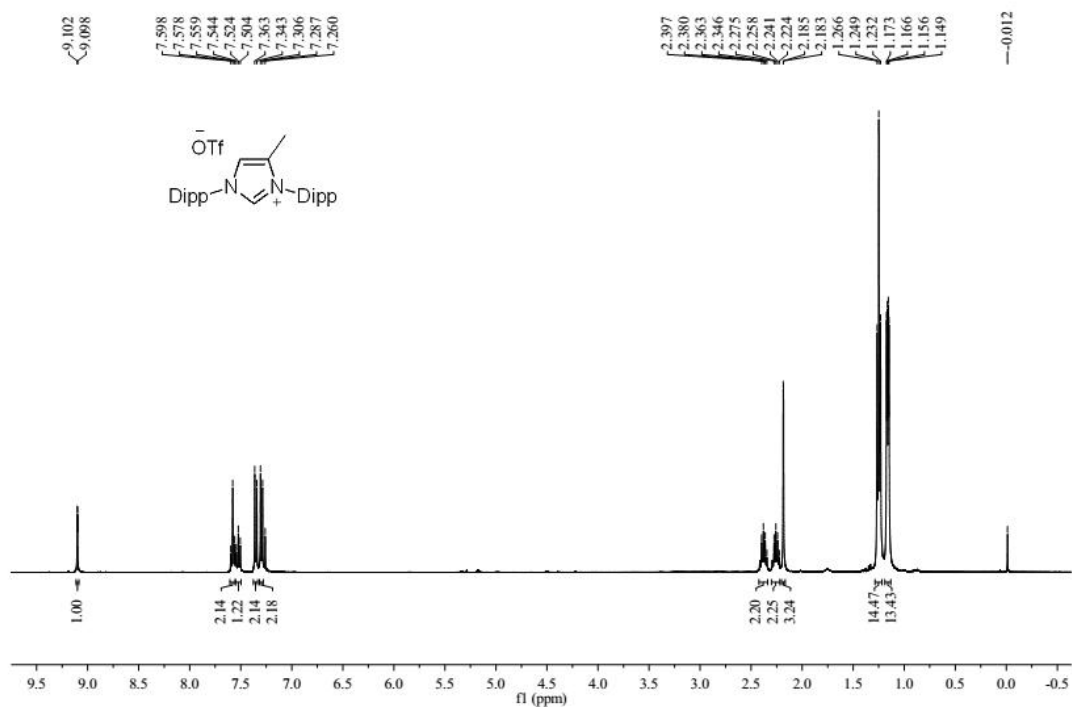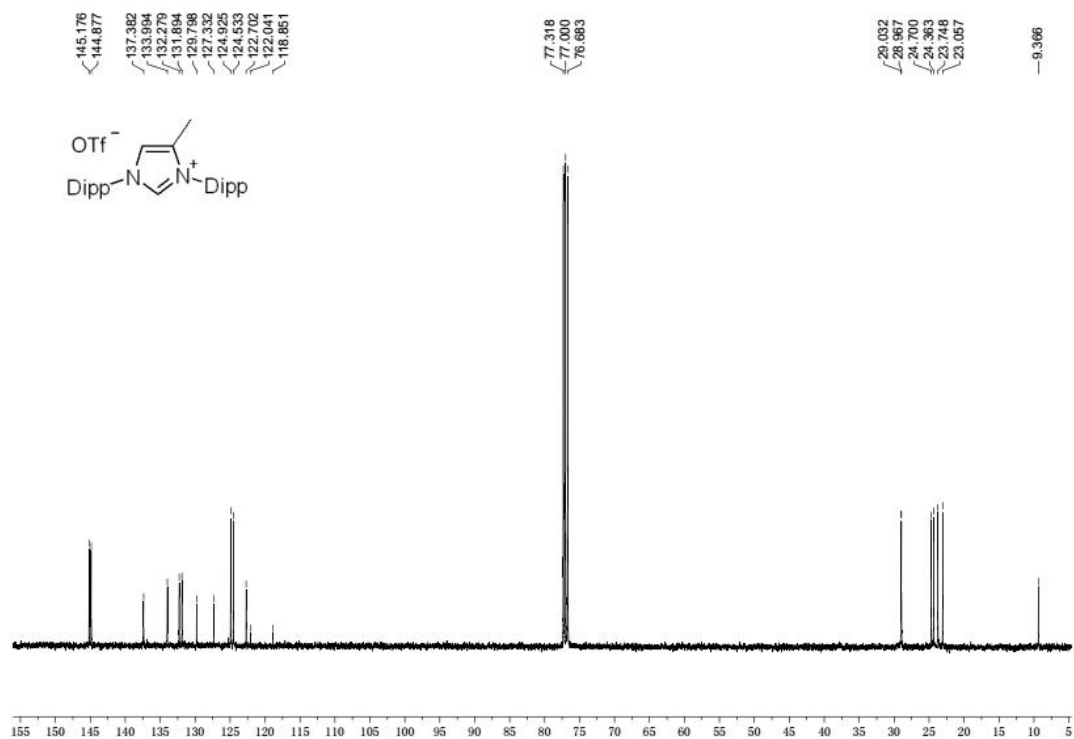

# compound 5

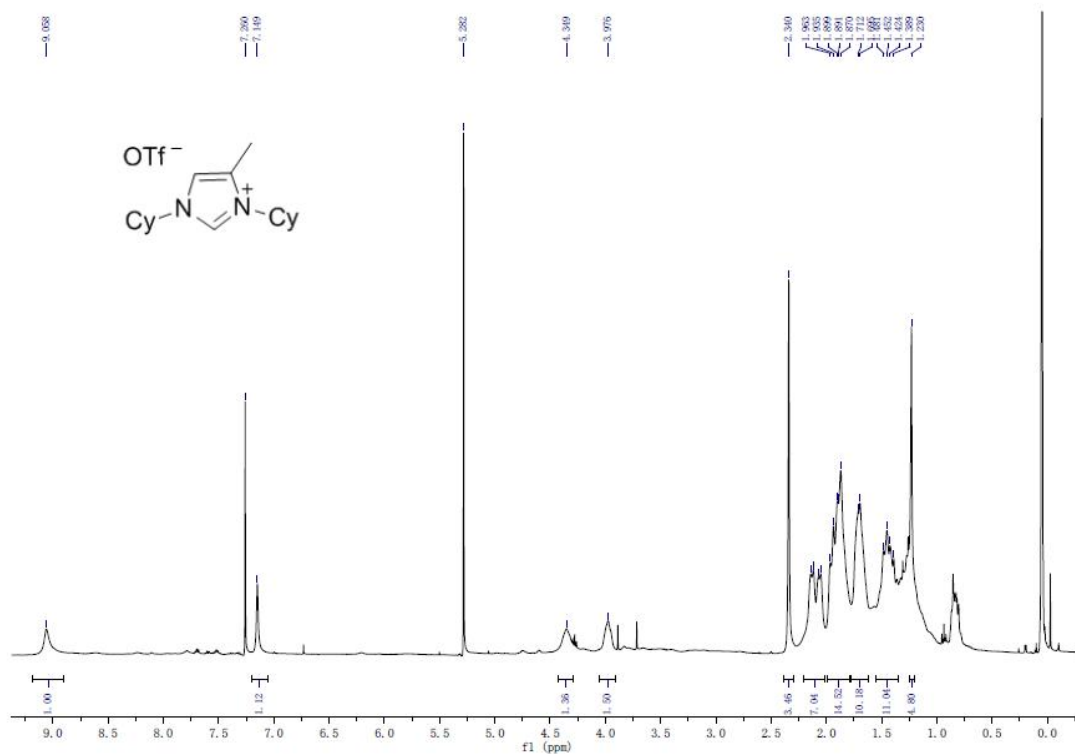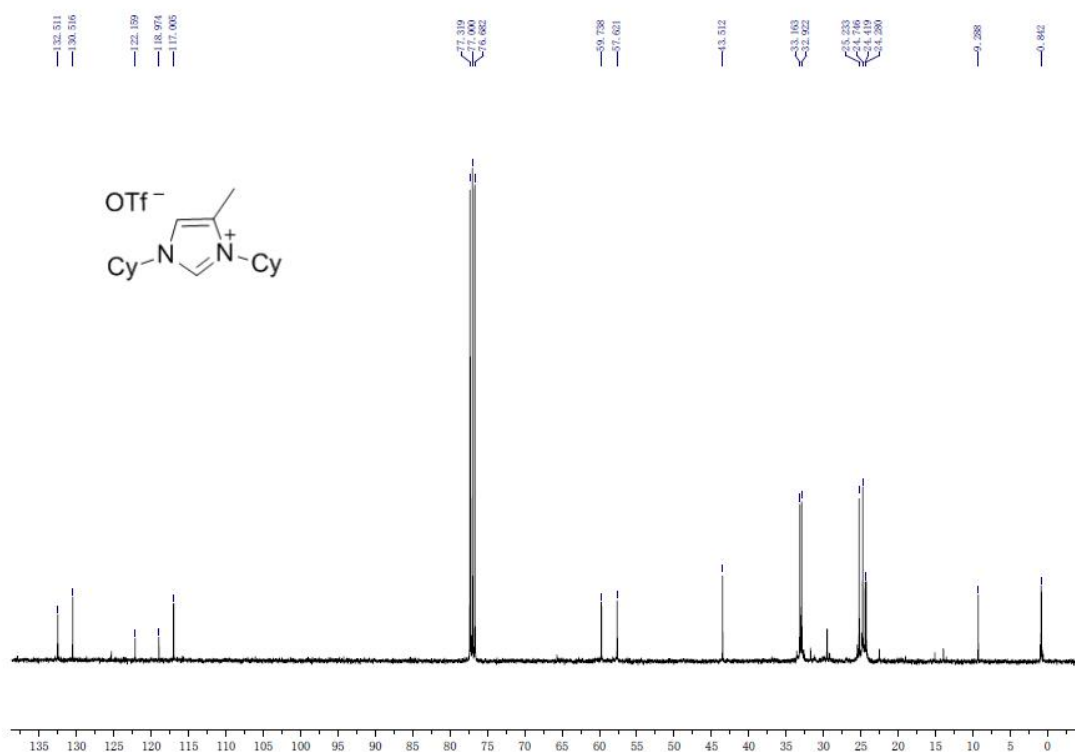

compound 6

7.899, 7.260, 6.983, 6.920, 4.974, 4.515, 3.994, 3.686, 3.682, 3.226, 2.265, 2.239, 2.190

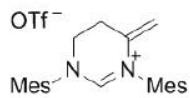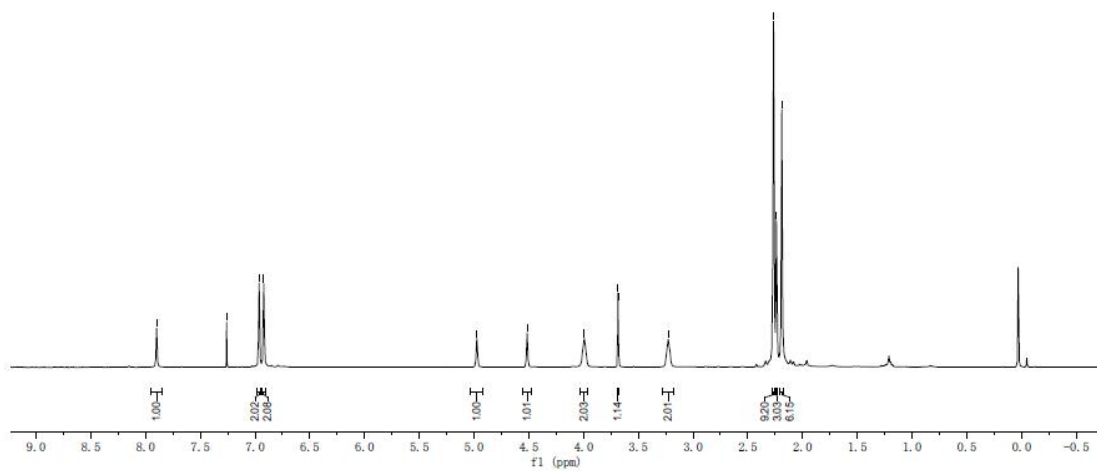

152.634, 141.057, 140.808, 135.789, 134.983, 134.850, 133.606, 132.691, 130.178, 130.152, 122.161, 118.974, 105.131, 77.318, 77.000, 76.682, 47.850, 25.217, 20.978, 20.916, 17.648, 17.207, -0.902

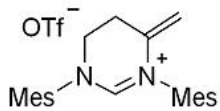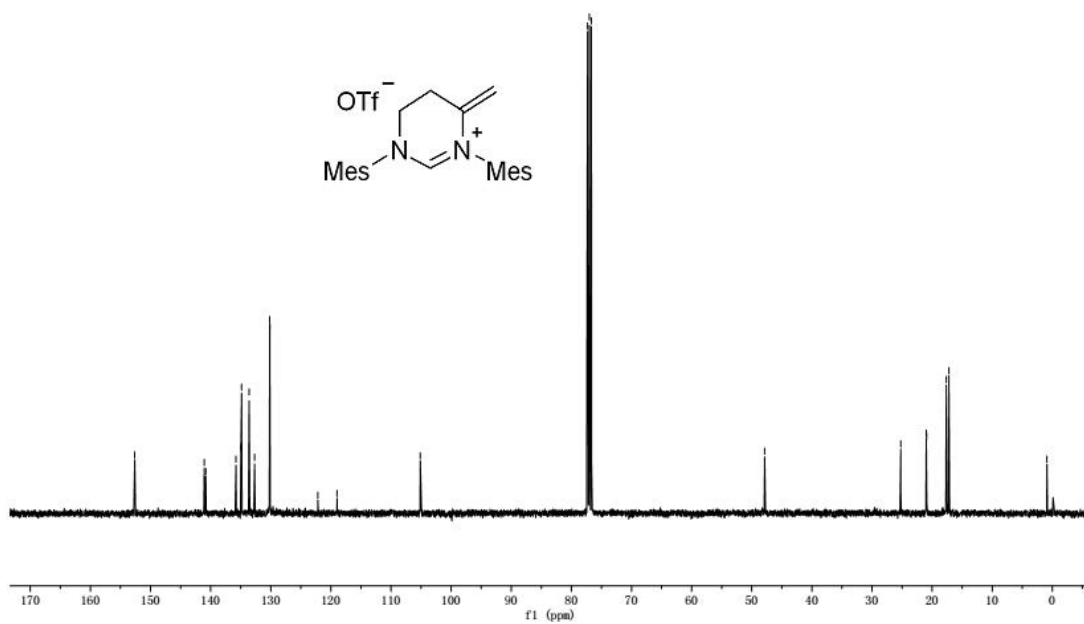

compound 7

$\delta$  7.887  
 $\delta$  7.280  
 $\delta$  6.991  
 $\delta$  5.530  
 $\delta$  4.596  
 $\delta$  2.402  
 $\delta$  2.324  
 $\delta$  2.307  
 $\delta$  2.291  
 $\delta$  1.608  
 $\delta$  1.600

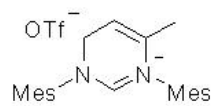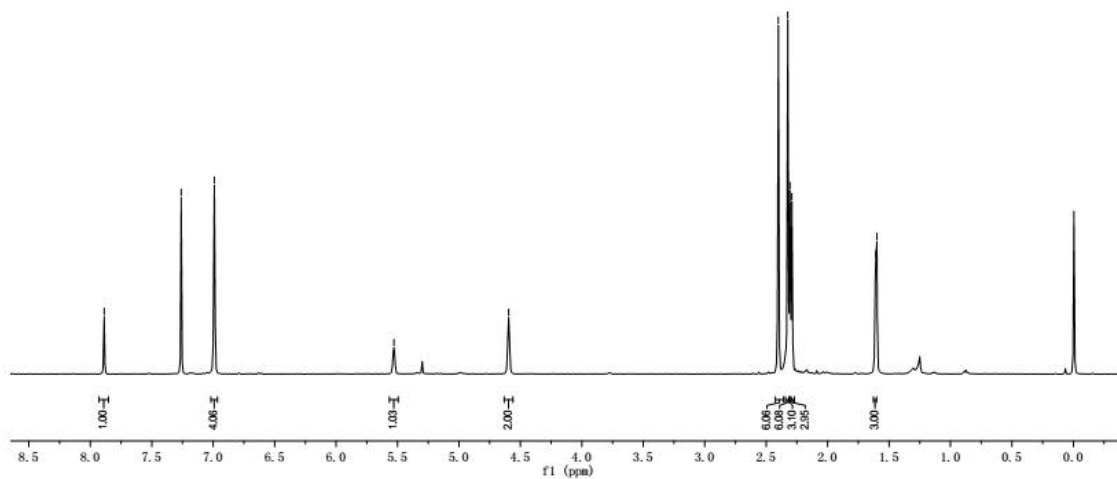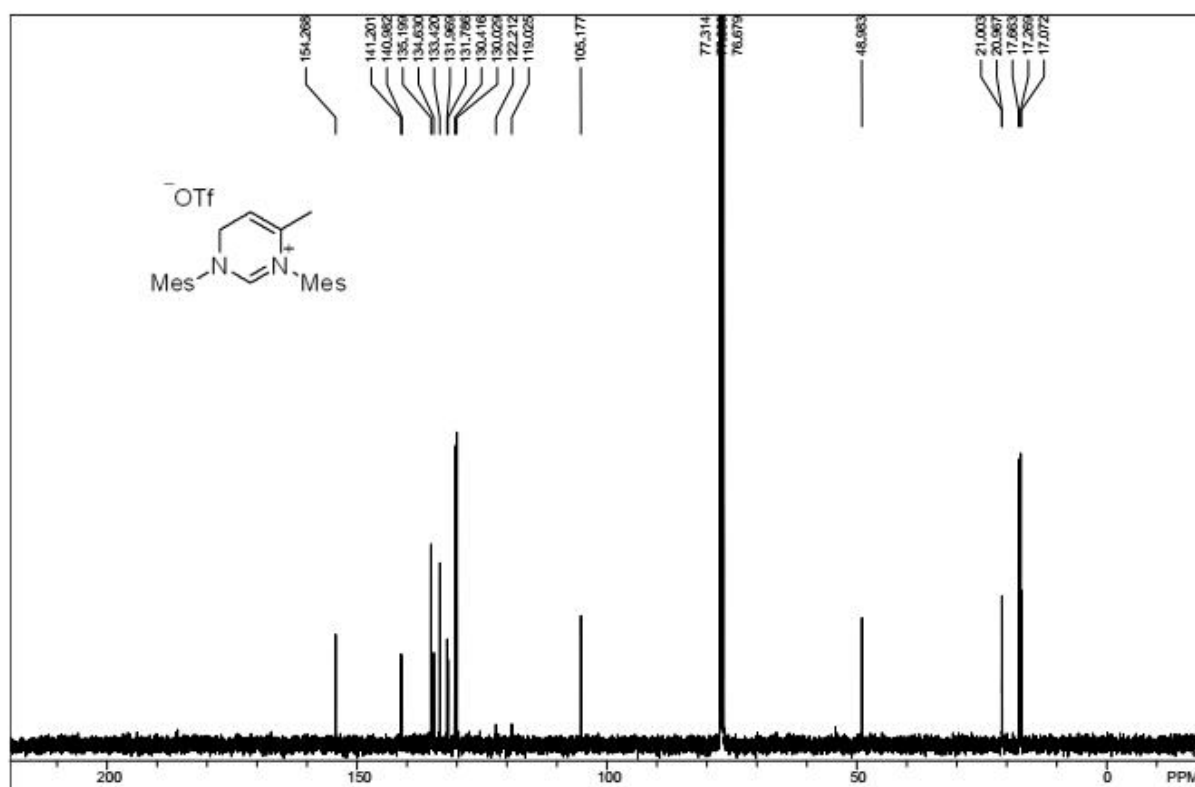

compound 8

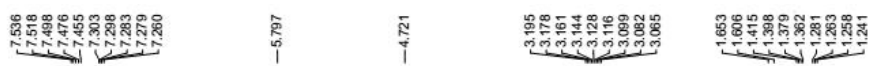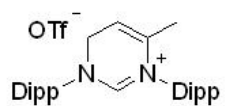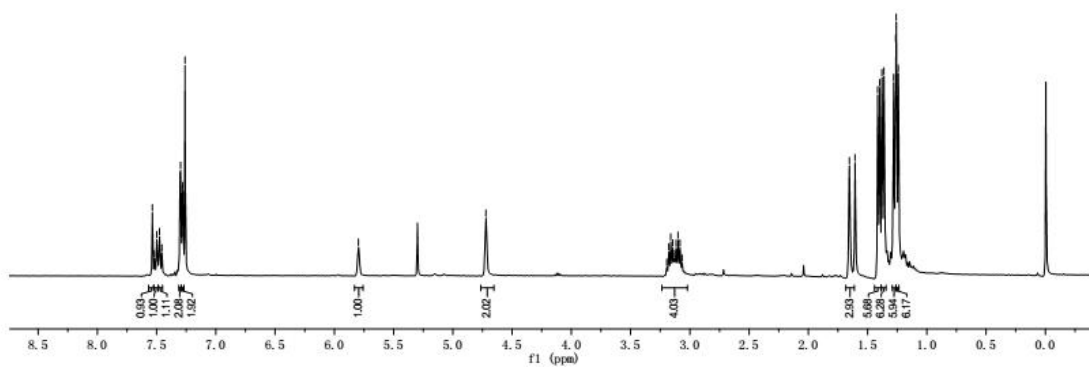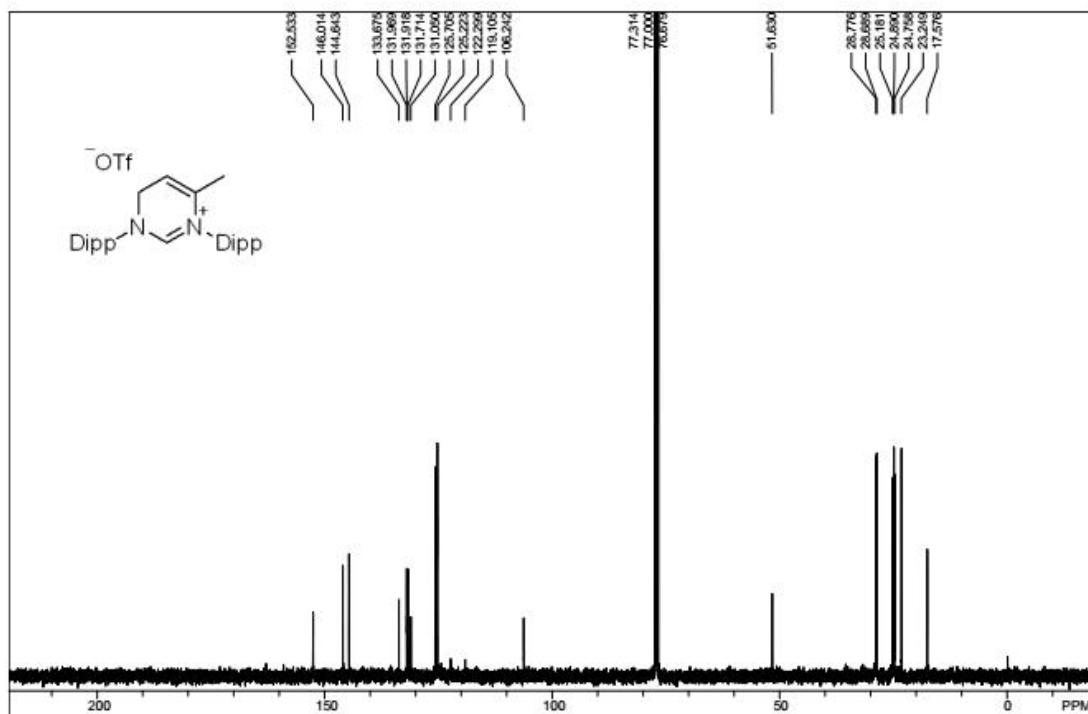

compound 9a

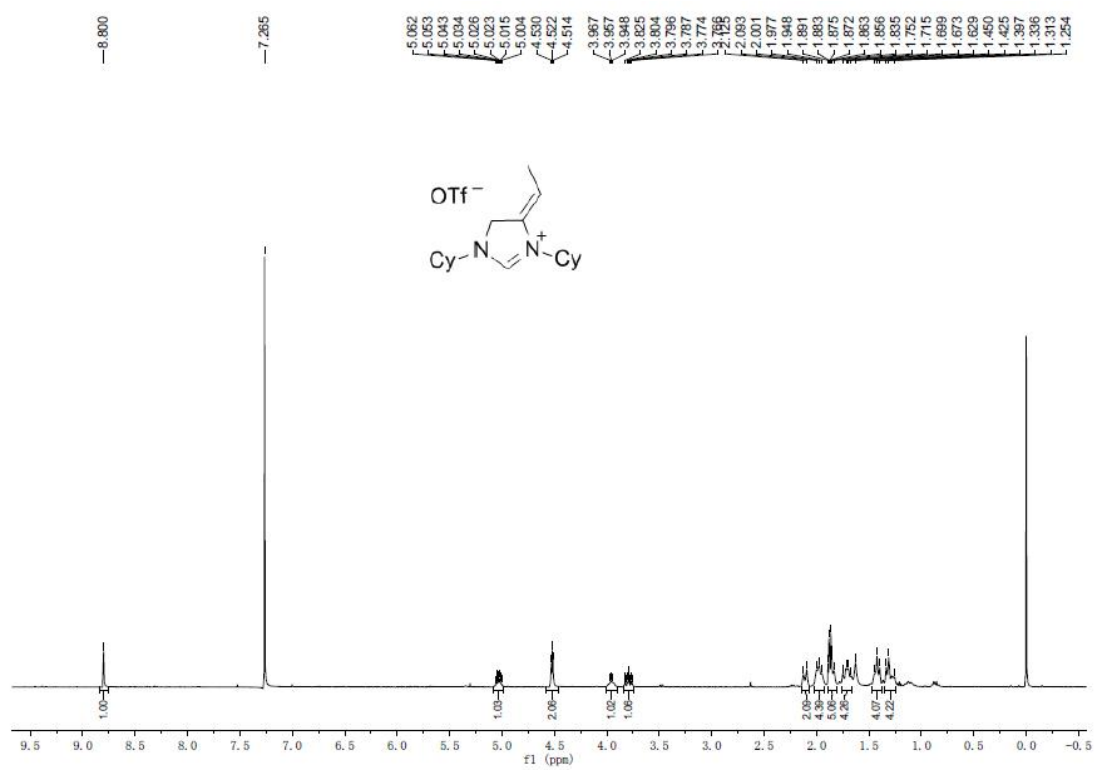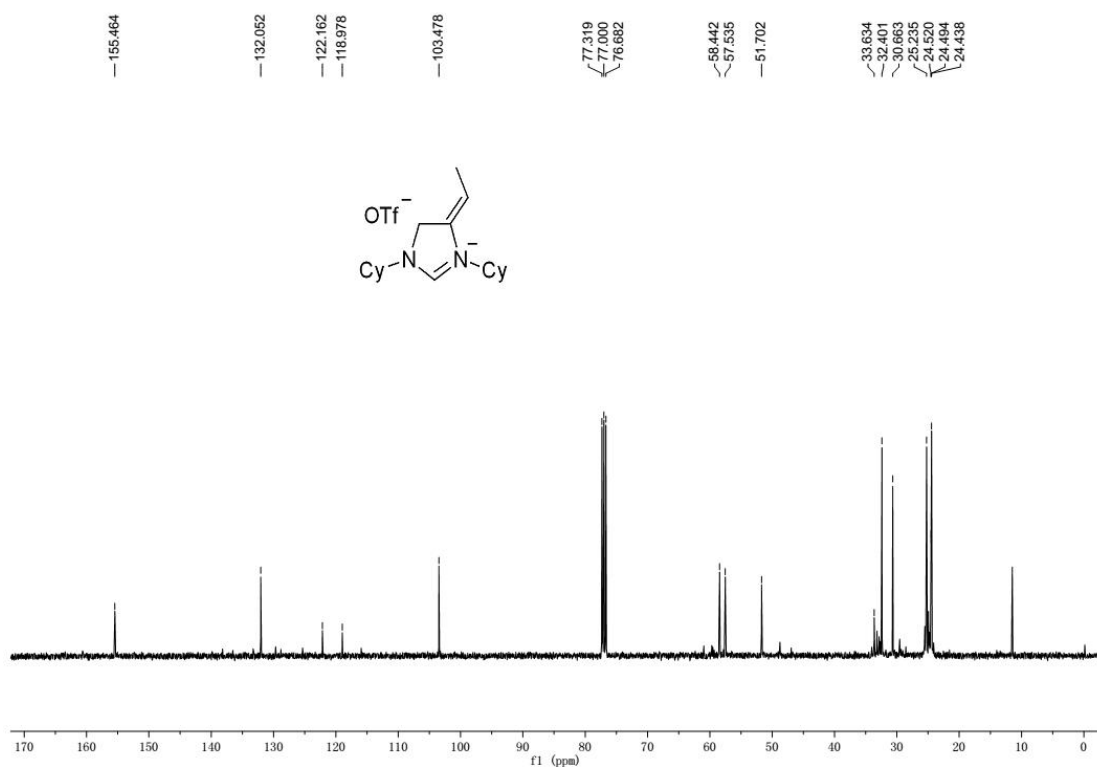

compound 9b

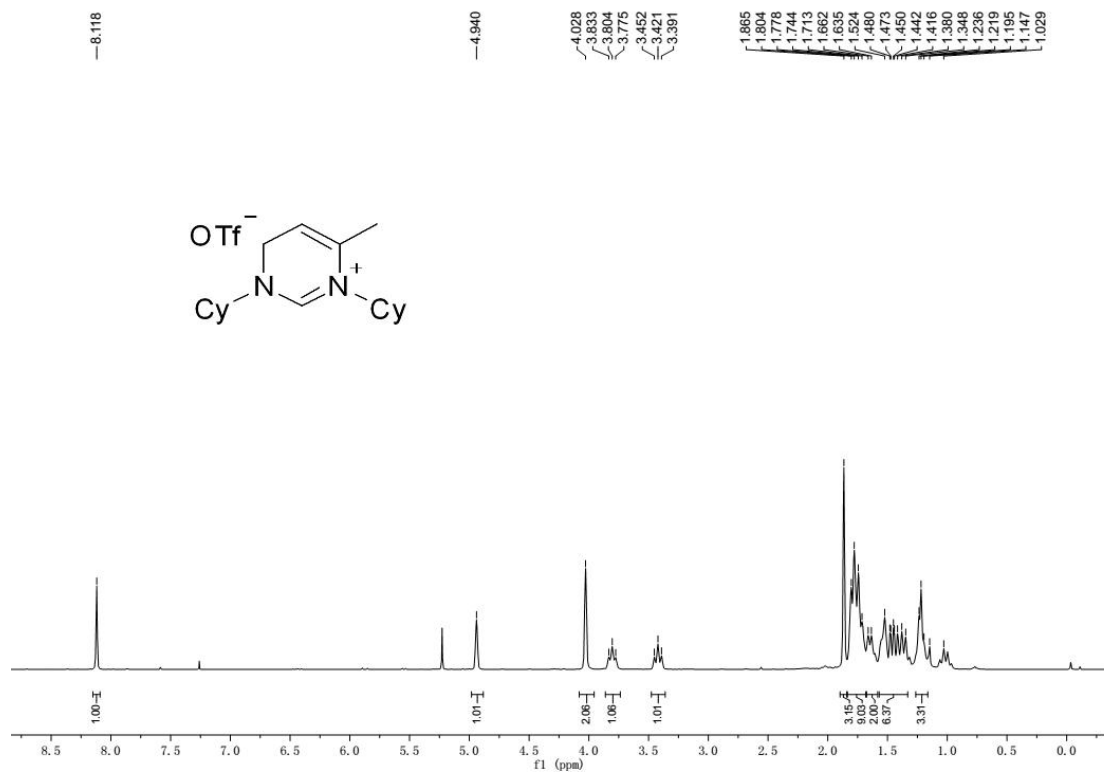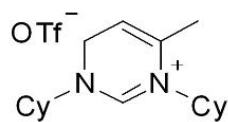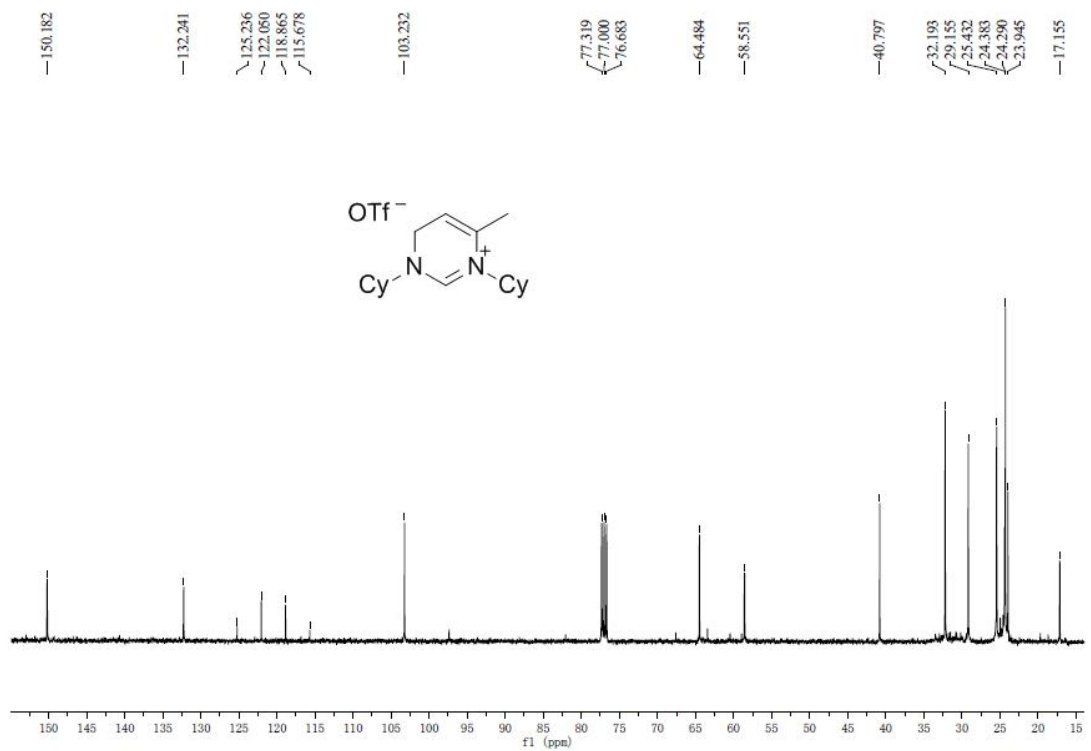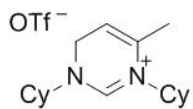

compound 10

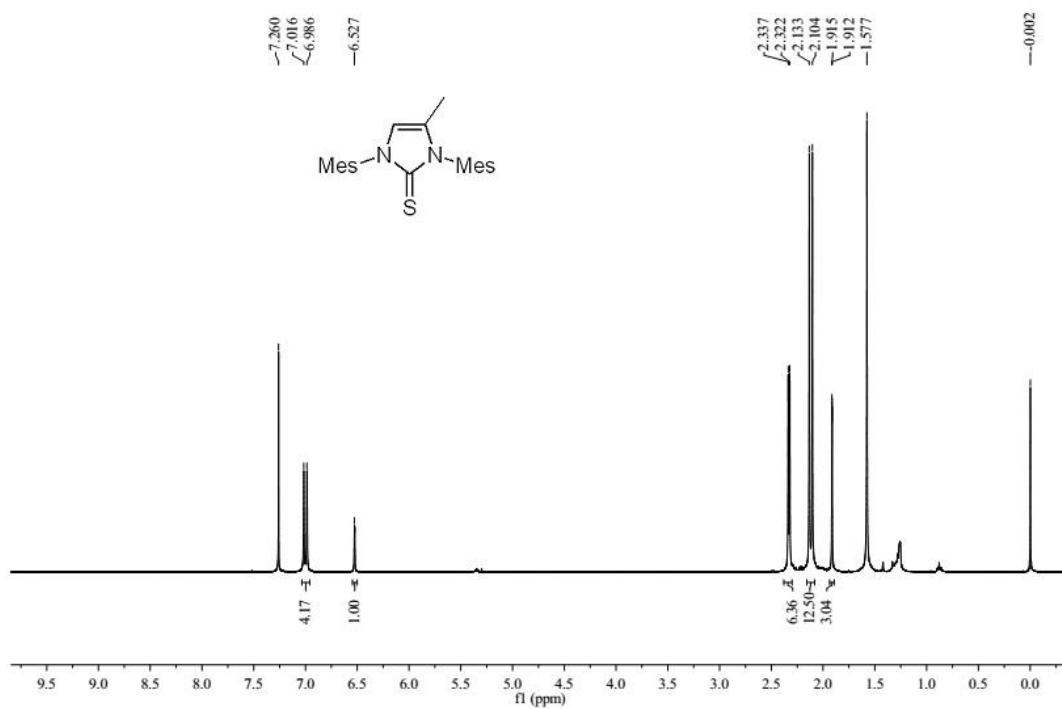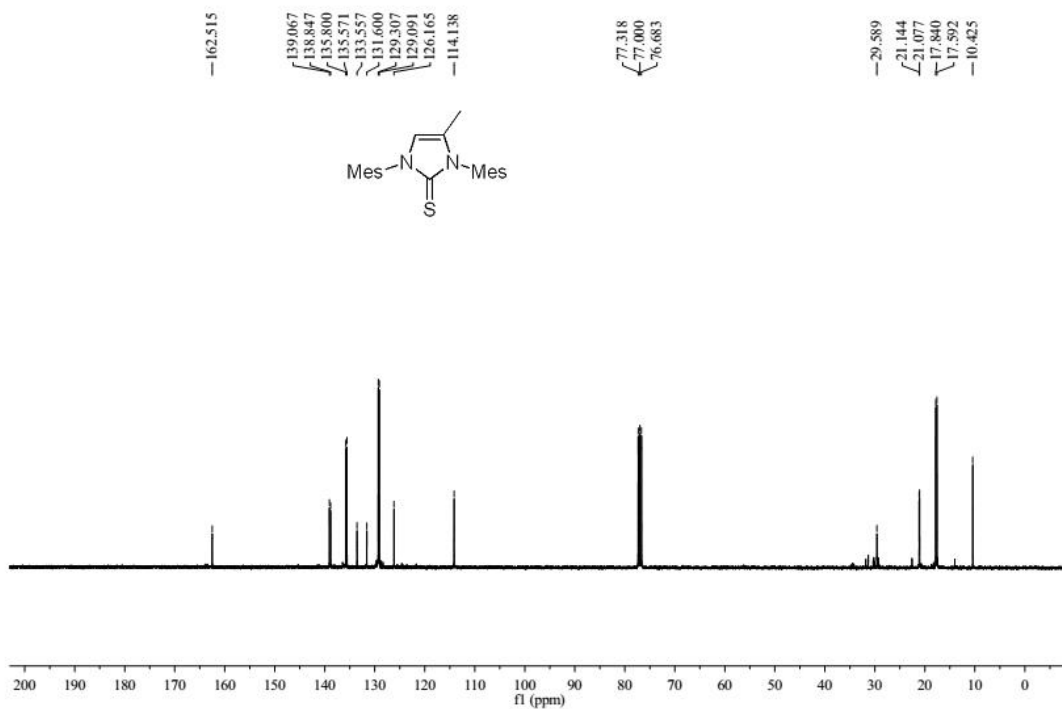



compound 11

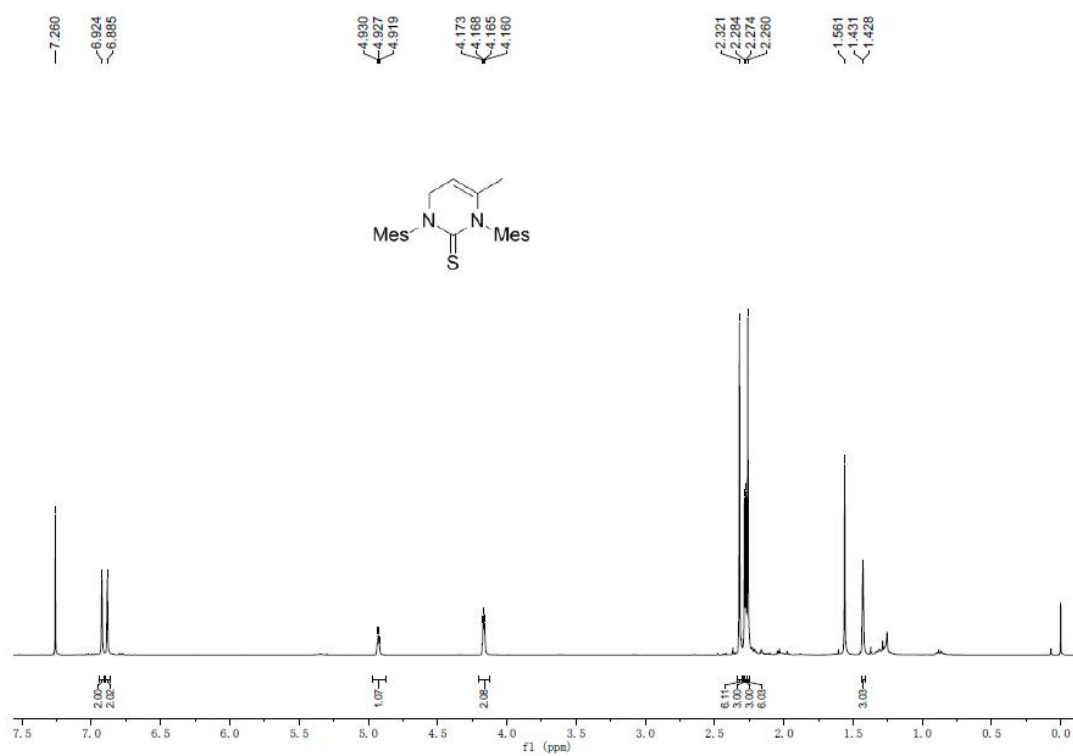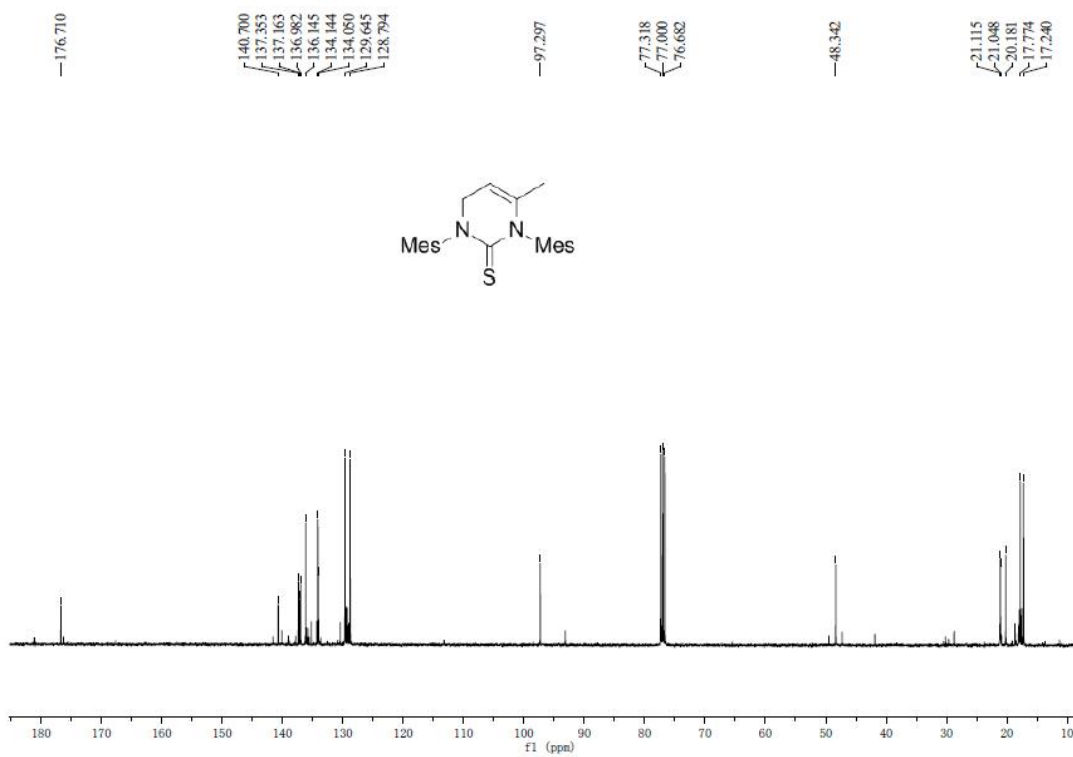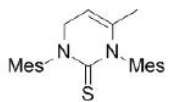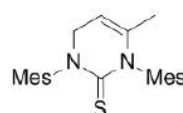

compound 12

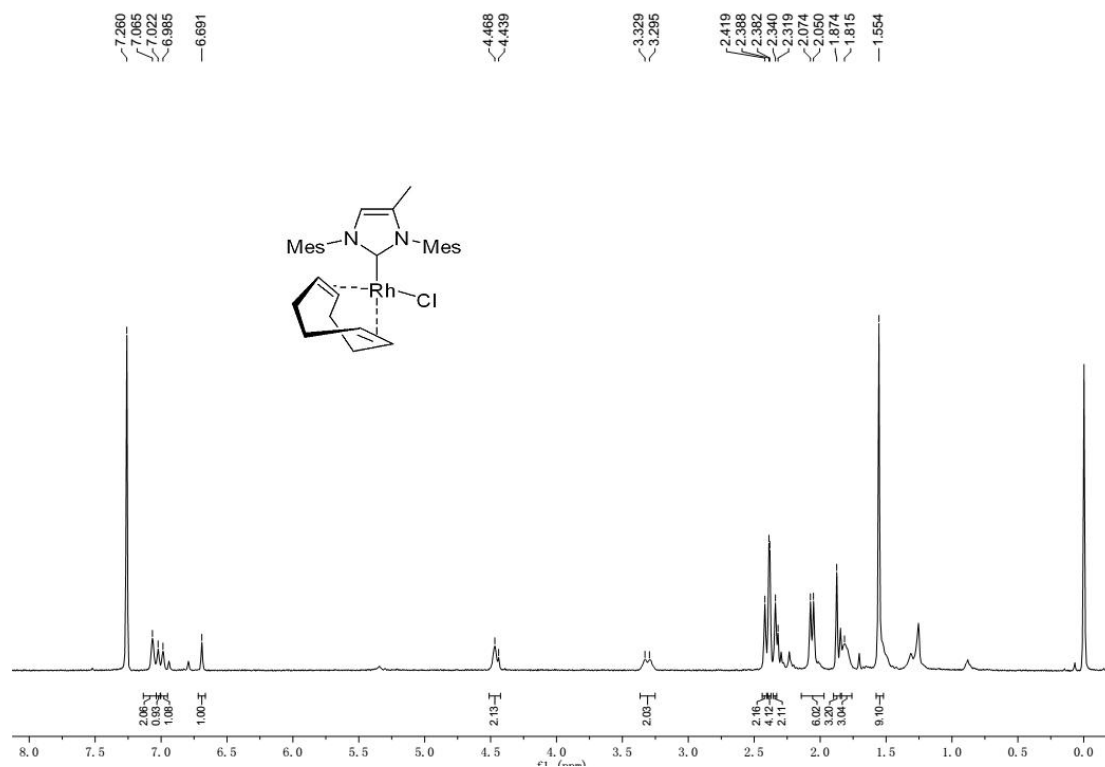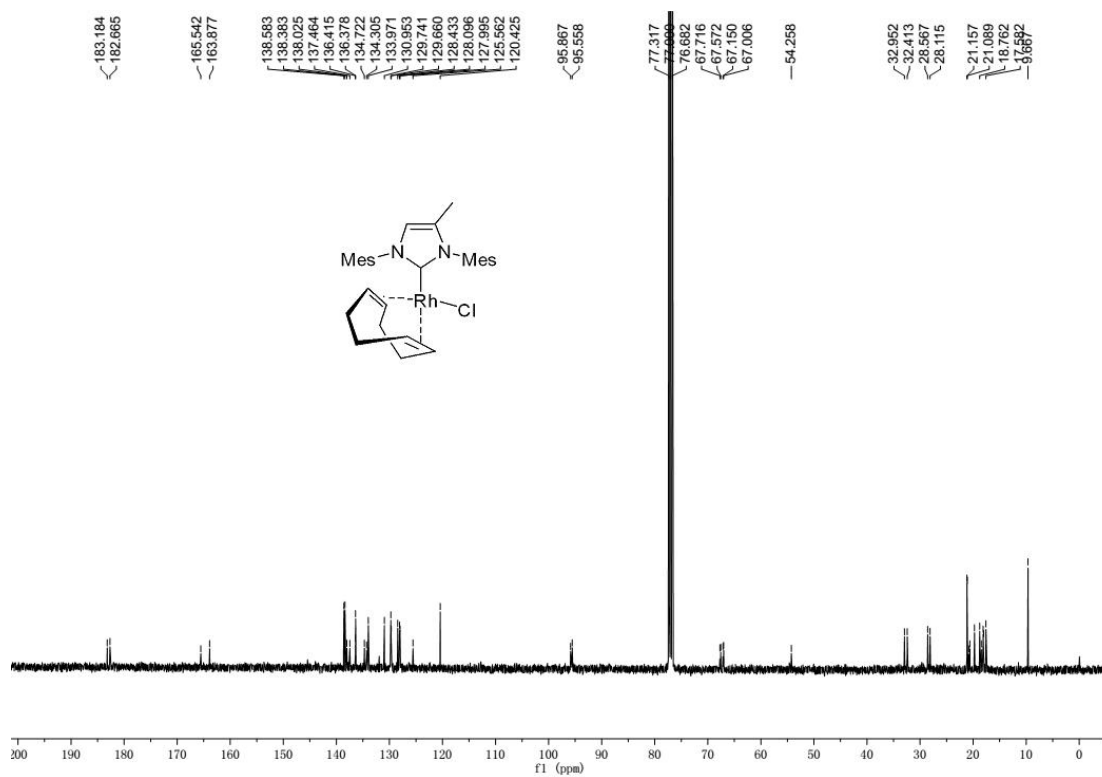

compound 13

7.260, 6.407, 6.399, 6.387, 6.378, 6.370, 6.358, 6.349, 6.344, 6.304, 6.296, 6.288, 6.274, 6.266, 6.258, 6.244, 6.236, 6.229, 4.910, 4.604, 4.596, 4.594, 4.585, 3.526, 3.523, 3.519, 3.515, 3.512, 3.376, 3.370, 3.361, 3.355, 2.398, 2.375, 2.352, 2.333, 2.310, 2.206, 2.178, 2.133, 2.104, 1.989, 1.941, 1.908, 1.876, 1.854, 1.824, 1.788, 1.749, 1.627, 1.609, 1.592, 1.552, 1.371, 1.332, 1.301, 1.156, 1.124, 1.084

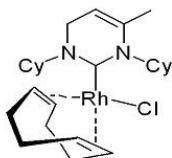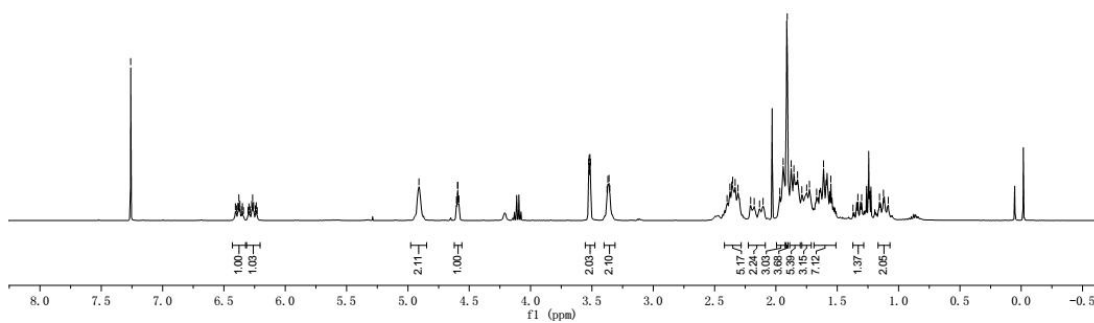

211.558, 211.097

134.900

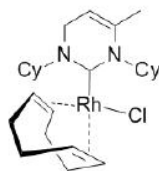

102.559, 96.066, 95.996, 95.690, 95.623, 77.318, 77.203, 77.000, 76.682, 68.440, 68.290, 68.141, 67.325, 65.092, 34.067, 33.090, 30.649, 29.666, 29.179, 27.607, 26.849, 26.128, 25.983, 25.935, 25.684, 21.585, 0.978

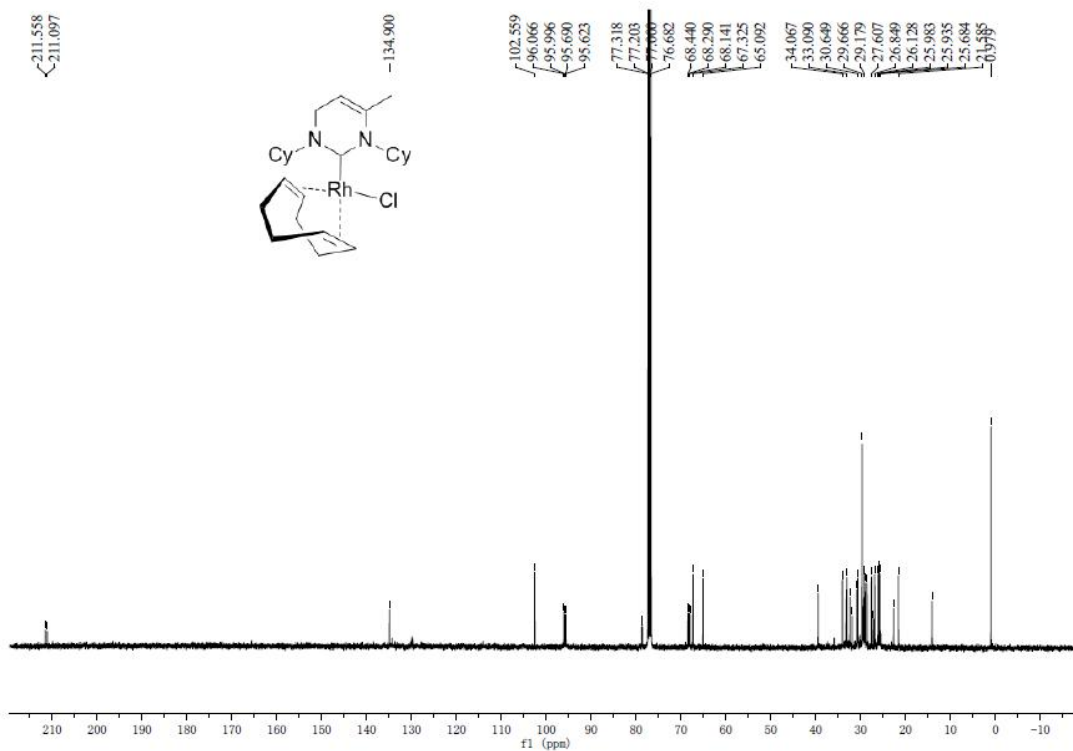

**X-Ray Crystallography:** Each crystal was mounted on a glass fiber. Crystallographic measurements were made on a Bruker Smart Apex 100 CCD area detector using graphite monochromated Mo-K $\alpha$  radiation ( $\lambda_{\text{Mo-K}\alpha} = 0.71073 \text{ \AA}$ ). The structures were solved by direct methods (SHELXS-97) and refined on F<sup>2</sup> by full-matrix least squares (SHELX-97) using all unique data. All the calculations were carried out with the SHELXTL18 program.

Key details of the crystal and structure refinement data are summarized in Table S1-S2. Further crystallographic details may be found in the respective CIF files, which were deposited at the Cambridge Crystallographic Data Centre, Cambridge, UK [CCDC 1507982 (**7**) and 1507983 (**3a**)].

**Table S1**

|                                                 | <b>3a</b>                                                                                      | <b>7</b>                                                                       |
|-------------------------------------------------|------------------------------------------------------------------------------------------------|--------------------------------------------------------------------------------|
| Identification code                             | a40411ba                                                                                       | mo_40408b                                                                      |
| Formula                                         | C <sub>30</sub> H <sub>41</sub> Cl <sub>2</sub> F <sub>3</sub> N <sub>2</sub> O <sub>3</sub> S | C <sub>24</sub> H <sub>29</sub> F <sub>3</sub> N <sub>2</sub> O <sub>3</sub> S |
| Formula weight                                  | 637.61                                                                                         | 482.55                                                                         |
| T, K                                            | 293(2)                                                                                         | 213(2)                                                                         |
| crystal system                                  | Orthorhombic                                                                                   | Monoclinic                                                                     |
| space group                                     | P b c a                                                                                        | P 21/c                                                                         |
| a, Å                                            | 20.338(7)                                                                                      | 15.879(3)                                                                      |
| b, Å                                            | 16.179(5)                                                                                      | 9.6304(17)                                                                     |
| c, Å                                            | 21.087(7)                                                                                      | 17.698(3)                                                                      |
| α, deg                                          | 90                                                                                             | 90                                                                             |
| β, deg                                          | 90                                                                                             | 111.401(3)                                                                     |
| γ, deg                                          | 90                                                                                             | 90                                                                             |
| Volume, Å <sup>3</sup>                          | 6938(4)                                                                                        | 2519.7(8)                                                                      |
| Z                                               | 8                                                                                              | 4                                                                              |
| Dcalc, Mg / m <sup>3</sup>                      | 1.221                                                                                          | 1.272                                                                          |
| absorption coefficient, mm <sup>-1</sup>        | 0.294                                                                                          | 0.177                                                                          |
| F(000)                                          | 2688                                                                                           | 1016                                                                           |
| crystal size, mm                                | 0.600 x 0.150 x 0.100                                                                          | 0.450 x 0.200 x 0.050                                                          |
| 2θ range, deg                                   | 1.876 to 25.006                                                                                | 2.350 to 25.007                                                                |
| reflections                                     | 25983/6084                                                                                     | 14464/4411                                                                     |
| collected /unique data / restraints/ parameters | [R(int) = 0.0964]<br>6084 / 0 / 382                                                            | [R(int) = 0.00.0367]<br>4411 / 34 / 329                                        |
| goodness of fit on F <sup>2</sup>               | 0.911                                                                                          | 1.034                                                                          |
| final R indices [I > 2σ(I)]a                    | R1 = 0.0730, wR2 = 0.1881                                                                      | R1 = 0.0510, wR2 = 0.1553                                                      |
| R indices (all data)                            | R1 = 0.1718, wR2 = 0.2294                                                                      | R1 = 0.0795, wR2 = 0.1776                                                      |
| lgst diff peak and hole, e/Å <sup>3</sup>       | 0.508 and -0.339                                                                               | 0.281 and -0.266                                                               |
